# Supplementary material for: Protein Molecular Surface Mapped at Different Geometrical Resolutions
Source: PLoS One. 2013 Mar 14;8(3):e58896. doi: 10.1371/journal.pone.0058896 (PMC3597524; doi:10.1371/journal.pone.0058896)
Supplement: File S1 — (XLSX) [file pone.0058896.s001.xlsx]

## Sheet: Readme
General information
Each sheet presents the results of probing protein molecular surface with probe radii from 1.4 A to 20 A
There are two sets of worksheets, the first organised by property measured, the second organised by probing radii
The sheets containing information organised by property (set 1) also contains two charts, for comparison: one (smaller) with the data presented in the manuscript; and one with all data (35 proteins)
A. Worsheets containing values organised along molecular surface-derived properties
The sheet name contains 3 fields
1st field
	AA	means Amino Acid-based property, i.e., hydrophobicity, hydrophilicity and amphiphilicity
	Chg	means Charge-based data
2nd field
	T	means Total
	R	means Ratio
	S	means Specific
	pho	means Hydrophobicity
	phi	means Hydrophilicity
	amphi	means Amphiphilicity
3rd field
	ty	refers to the actual property
	A	refers to the respective area
B. Worsheets containing values organised along probing radii
The sheet name contain 1 field: AA_number, [number] = radius of the probe

## Sheet: AA_T_pho_ty
	AA_T_pho_ty_1.4A	AA_T_pho_ty_2A	AA_T_pho_ty_3A	AA_T_pho_ty_4A	AA_T_pho_ty_5A	AA_T_pho_ty_6A	AA_T_pho_ty_7A	AA_T_pho_ty_8A	AA_T_pho_ty_9A	AA_T_pho_ty_10A	AA_T_pho_ty_11A	AA_T_pho_ty_12A	AA_T_pho_ty_13A	AA_T_pho_ty_14A	AA_T_pho_ty_15A	AA_T_pho_ty_16A	AA_T_pho_ty_17A	AA_T_pho_ty_18A	AA_T_pho_ty_19A	AA_T_pho_ty_20A
	1.4	2	3	4	5	6	7	8	9	10	11	12	13	14	15	16	17	18	19	20
1A4V	-7.67407	-4.97017	-2.83889	-1.90072	-1.38623	-0.992228	-0.855071	-0.676952	-0.578537	-0.512393	-0.46352	-0.423775	-0.393384	-0.337598	-0.310913	-0.265667	-0.240187	-0.216137	-0.214067	-0.199607
1EXS	-8.55424	-5.26887	-2.74132	-1.77464	-1.37326	-1.02163	-0.895472	-0.803094	-0.700697	-0.624983	-0.606686	-0.55657	-0.499088	-0.473686	-0.434083	-0.401344	-0.370033	-0.358422	-0.335131	-0.321385
1BEB	-10.2296	-5.27694	-2.64825	-1.59237	-1.1451	-0.863678	-0.686056	-0.552428	-0.468163	-0.415588	-0.392319	-0.361916	-0.333119	-0.300834	-0.270937	-0.228005	-0.21357	-0.199752	-0.190952	-0.183052
1LYZ	-4.80815	-1.82644	-0.963906	-0.549272	-0.351143	-0.253651	-0.198708	-0.155418	-0.131527	-0.113992	-0.0938082	-0.0757902	-0.0754447	-0.0648066	-0.0518379	-0.048351	-0.0435012	-0.0404954	-0.0328019	-0.0287819
135L	-4.23713	-1.66274	-0.814837	-0.454869	-0.269923	-0.187335	-0.145195	-0.110526	-0.0967696	-0.0700039	-0.0610261	-0.0506752	-0.038666	-0.0367549	-0.036078	-0.0327106	-0.0303374	-0.0271354	-0.0274625	-0.0274235
2LYM	-4.36973	-1.76786	-0.805176	-0.422919	-0.28028	-0.192069	-0.159649	-0.117808	-0.0981523	-0.0844563	-0.0592758	-0.056604	-0.0525498	-0.045226	-0.0397418	-0.0265091	-0.0260699	-0.0266388	-0.0273417	-0.0273042
2LZT	-4.22473	-1.67203	-0.755931	-0.42099	-0.281542	-0.19968	-0.143128	-0.114799	-0.102391	-0.0810885	-0.0666903	-0.0624747	-0.0611587	-0.0606615	-0.0561797	-0.0510928	-0.0446401	-0.0411969	-0.0375384	-0.0375129
1L35	-6.3687	-2.48246	-1.15734	-0.591835	-0.390098	-0.256072	-0.202847	-0.15826	-0.13253	-0.107121	-0.100154	-0.0870788	-0.0806205	-0.0727516	-0.0640113	-0.0592537	-0.0518286	-0.0447793	-0.0451221	-0.0336049
1LYD	-6.71618	-2.66821	-1.2469	-0.679739	-0.459628	-0.299347	-0.225262	-0.162284	-0.123398	-0.104084	-0.0562715	-0.0420677	-0.0345248	-0.0231889	-0.0228964	-0.0215265	-0.019429	-0.018059	-0.0166554	-0.0166472
8RAT	-2.2171	-0.958727	-0.447459	-0.258156	-0.193494	-0.133178	-0.106169	-0.0947179	-0.0863222	-0.0778307	-0.0727047	-0.0585274	-0.053181	-0.0489638	-0.0437795	-0.0412338	-0.0410979	-0.0364886	-0.0343453	-0.0296258
1RBX	-2.26119	-0.879893	-0.453438	-0.255697	-0.187469	-0.14431	-0.113897	-0.0930592	-0.0797653	-0.0677211	-0.0651397	-0.0618738	-0.0548224	-0.0458661	-0.045511	-0.0446567	-0.0427979	-0.0379306	-0.0345176	-0.0344702
3RN3	-2.08195	-0.820465	-0.382999	-0.216609	-0.146522	-0.113733	-0.0925569	-0.07483	-0.0667471	-0.0572417	-0.0496624	-0.0358985	-0.0333738	-0.031201	-0.0276818	-0.0265129	-0.0247466	-0.0249044	-0.0245243	-0.0229385
1AFU	-4.22619	-2.62989	-1.40236	-0.911096	-0.686363	-0.535622	-0.457107	-0.388829	-0.326685	-0.296677	-0.273049	-0.251906	-0.221853	-0.2022	-0.174037	-0.15766	-0.146348	-0.140569	-0.136929	-0.135245
1HHO	-12.938	-4.84127	-1.74555	-0.925207	-0.586302	-0.399147	-0.307628	-0.244086	-0.213786	-0.178175	-0.155677	-0.135416	-0.123728	-0.111096	-0.0977841	-0.0816745	-0.0720012	-0.0716274	-0.0695064	-0.0659
2HCO	-13.8582	-5.04953	-1.74788	-0.917757	-0.608845	-0.408554	-0.327951	-0.276879	-0.219628	-0.202715	-0.18256	-0.137924	-0.124245	-0.117867	-0.0993032	-0.0983563	-0.094865	-0.0896961	-0.0892469	-0.0872541
2DHB	-14.733	-5.79854	-2.15437	-1.14806	-0.791612	-0.564609	-0.447565	-0.359496	-0.334197	-0.294347	-0.256462	-0.229002	-0.204687	-0.173796	-0.152856	-0.129528	-0.125367	-0.12273	-0.123631	-0.11309
1BUW	-21.2557	-10.3293	-3.90069	-2.03678	-1.2653	-0.822394	-0.633793	-0.49173	-0.389371	-0.320477	-0.286719	-0.255472	-0.207138	-0.182865	-0.165227	-0.145577	-0.135879	-0.125567	-0.117083	-0.115221
1Y4G	-20.4554	-10.1063	-3.46189	-1.68669	-1.04351	-0.605574	-0.498831	-0.407998	-0.313689	-0.260877	-0.25289	-0.22323	-0.199805	-0.180449	-0.166765	-0.155398	-0.125703	-0.123443	-0.121008	-0.115445
1Y4F	-20.7597	-10.2834	-3.56887	-1.68776	-1.02956	-0.65205	-0.507199	-0.407667	-0.337746	-0.283978	-0.26904	-0.241572	-0.201616	-0.181858	-0.170268	-0.15314	-0.138515	-0.126941	-0.118327	-0.114634
1A01	-19.6655	-9.58841	-3.37472	-1.67244	-1.02457	-0.651841	-0.489548	-0.379268	-0.294581	-0.250654	-0.247183	-0.229623	-0.202039	-0.191951	-0.16952	-0.150625	-0.137194	-0.13054	-0.128601	-0.126744
1Y4P	-20.3328	-10.107	-3.4628	-1.67374	-0.995416	-0.62036	-0.502414	-0.382282	-0.311488	-0.25236	-0.252218	-0.224901	-0.194476	-0.180344	-0.170439	-0.150246	-0.133253	-0.1312	-0.120685	-0.111272
1A00	-20.0317	-9.93588	-3.49957	-1.78849	-1.1075	-0.708224	-0.524126	-0.431745	-0.336924	-0.287747	-0.266632	-0.247825	-0.20834	-0.183122	-0.165492	-0.156338	-0.140625	-0.138752	-0.135188	-0.126141
1AY46	-20.6983	-10.4489	-3.69728	-1.77716	-1.11478	-0.71003	-0.539819	-0.431888	-0.339311	-0.275569	-0.242498	-0.229732	-0.178036	-0.164636	-0.145951	-0.143148	-0.134374	-0.126739	-0.122125	-0.107054
2HHB	-25.6438	-9.00946	-2.73507	-1.30772	-0.722256	-0.447037	-0.335346	-0.223696	-0.200329	-0.149074	-0.134576	-0.121438	-0.094239	-0.087579	-0.0713193	-0.0700989	-0.0645133	-0.0582991	-0.0565423	-0.0529648
1A0U	-21.172	-10.515	-3.76338	-1.96024	-1.20644	-0.792063	-0.614618	-0.470445	-0.41559	-0.318417	-0.296299	-0.24769	-0.208889	-0.191296	-0.177695	-0.169866	-0.159919	-0.134704	-0.132648	-0.12335
1A0Z	-20.7	-10.4764	-3.75822	-1.9341	-1.19663	-0.788394	-0.584401	-0.476162	-0.40569	-0.298284	-0.262902	-0.226414	-0.191105	-0.166367	-0.149126	-0.140911	-0.129963	-0.125587	-0.127166	-0.117957
1C7D	-23.0409	-12.1236	-4.82321	-2.64998	-1.66736	-1.19071	-0.966669	-0.751556	-0.618002	-0.510936	-0.411956	-0.341913	-0.307653	-0.273949	-0.253385	-0.235271	-0.192187	-0.174284	-0.170802	-0.153421
1E7I	-18.4427	-8.126	-2.35235	-1.2568	-0.80136	-0.459939	-0.309833	-0.23155	-0.189025	-0.149094	-0.140978	-0.121337	-0.100746	-0.0873984	-0.080252	-0.0758155	-0.0734239	-0.0721566	-0.0676614	-0.065744
1UOR	-23.2746	-12.7396	-6.77166	-4.27533	-2.98731	-2.07871	-1.69582	-1.40255	-1.17634	-0.988094	-0.867097	-0.781143	-0.71911	-0.678218	-0.621709	-0.559862	-0.49387	-0.464936	-0.430327	-0.417932
1E_78	-22.1896	-7.19573	-1.74084	-0.680011	-0.386283	-0.251479	-0.166629	-0.115596	-0.0883652	-0.0596205	-0.0454678	-0.0358089	-0.0269508	-0.0246136	-0.0162564	-0.0163847	-0.0114073	-0.0118113	-0.0123674	-0.0106104
1AO6	-20.2951	-5.94542	-1.72548	-0.722466	-0.478881	-0.307295	-0.207563	-0.131314	-0.0989714	-0.0740985	-0.0681627	-0.0547312	-0.0453946	-0.0387311	-0.0349236	-0.0269095	-0.0246594	-0.0252617	-0.0258418	-0.0258255
1BM0	-20.3584	-5.81819	-1.66301	-0.734232	-0.456807	-0.284729	-0.204999	-0.139033	-0.0981788	-0.0688423	-0.0459358	-0.0414169	-0.032519	-0.024891	-0.0244834	-0.0230957	-0.0210016	-0.0178189	-0.0165751	-0.0165751
1IGY	-40.1853	-23.8739	-13.1035	-8.26296	-5.8609	-4.19367	-3.18228	-2.46637	-1.94506	-1.46512	-1.31592	-1.16929	-0.988702	-0.88058	-0.764623	-0.711298	-0.64494	-0.599374	-0.560926	-0.505825
1IGT	-47.1703	-29.0778	-15.9875	-10.1688	-7.23678	-5.15254	-4.15725	-3.2481	-2.62017	-2.08982	-1.79504	-1.58407	-1.36461	-1.2224	-1.06788	-0.983779	-0.87728	-0.788021	-0.722885	-0.683548
1HZH	-46.1466	-29.3755	-16.5494	-10.9804	-8.19727	-6.23269	-5.20088	-4.41274	-3.7871	-3.24554	-2.87813	-2.56408	-2.36274	-2.13665	-1.90504	-1.75856	-1.62801	-1.55187	-1.446	-1.36652

## Sheet: AA_pho_A
	AA_pho_A_1.4A	AA_pho_A_2A	AA_pho_A_3A	AA_pho_A_4A	AA_pho_A_5A	AA_pho_A_6A	AA_pho_A_7A	AA_pho_A_8A	AA_pho_A_9A	AA_pho_A_10A	AA_pho_A_11A	AA_pho_A_12A	AA_pho_A_13A	AA_pho_A_14A	AA_pho_A_15A	AA_pho_A_16A	AA_pho_A_17A	AA_pho_A_18A	AA_pho_A_19A	AA_pho_A_20A
	1.4	2	3	4	5	6	7	8	9	10	11	12	13	14	15	16	17	18	19	20
1A4V	562.108	351.894	197.766	132.091	95.0209	71.419	59.022	47.295	40.358	36.152	32.717	29.006	25.851	22.033	20.584	17.697	16.471	14.796	14.531	13.589
1EXS	741.991	453.813	246.882	164.217	125.782	97.2109	83.552	74.1691	65.486	59.05	54.863	48.926	44.481	41.812	38.705	35.782	33.373	31.469	29.274	28.102
1BEB	794.33	400.011	195.55	118.796	82.6539	62.879	48.628	37.723	31.549	27.89	25.664	22.52	20.517	18.578	17.352	14.732	14.003	13.044	12.568	12.09
1LYZ	380.483	146.263	75.937	45.795	30.422	21.212	15.805	12.642	10.454	8.98	7.553	6.126	5.879	4.941	4.211	3.957	3.721	3.489	3.025	2.777
135L	338.201	132.993	64.665	37.608	22.695	16.413	12.201	9.529	8.296	6.617	5.422	4.231	3.513	3.274	3.268	3.036	2.784	2.551	2.551	2.547
2LYM	345.071	137.31	62.075	34.58	22.643	15.414	11.715	9.023	7.32	6.114	4.459	4.211	3.955	3.483	3.247	2.318	2.314	2.311	2.308	2.306
2LZT	340.065	132.392	59.85	34.827	23.384	16.137	11.722	9.526	8.289	7.081	5.882	5.159	4.915	4.905	4.43	3.95	3.486	3.25	3.019	3.017
1L35	522.113	206.851	99.111	54.511	35.551	24.797	19.047	15.096	12.412	10.702	9.497	8.283	7.321	6.617	5.898	5.197	4.716	3.762	3.758	3.051
1LYD	531.216	211.598	99.7459	56.965	37.668	26.175	19.276	14.094	10.675	9.213	5.18	3.749	3.274	2.323	2.318	2.08	1.842	1.61	1.38	1.379
8RAT	268.731	121.165	57.793	35.247	25.749	18.508	14.576	12.816	11.579	10.602	9.184	7.732	7.253	6.768	6.057	5.581	5.573	4.866	4.625	3.93
1RBX	272.091	110.659	58.995	34.483	24.533	19.476	15.056	12.591	10.647	9.435	8.702	8.206	7.494	6.32	6.315	6.072	5.816	5.354	4.884	4.877
3RN3	247.356	102.978	48.282	28.591	18.473	14.688	11.961	9.984	8.755	7.542	6.354	4.683	4.445	4.198	3.717	3.481	3.242	3.24	3.237	3.003
1AFU	523.349	319.227	173.305	115.472	85.8769	69.362	56.826	49.082	40.998	38.498	33.454	30.509	27.146	24.962	22.109	19.964	18.761	17.793	17.546	17.298
1HHO	1025.59	391.161	148.322	83.3641	55.37	38.933	29.03	23.877	20.898	17.494	14.833	12.222	11.029	9.844	8.911	7.728	7.257	7.014	6.539	6.071
2HCO	1099.36	406.743	151.109	82.9061	53.72	39.427	31.642	26.495	20.942	19.219	16.805	12.993	11.807	11.306	9.646	9.394	9.148	8.209	7.967	7.713
2DHB	1129.59	443.538	172.022	95.8461	65.505	48.161	37.495	29.855	27.34	24.879	21.246	18.624	16.716	14.339	13.146	11.267	11.011	10.303	10.063	9.359
1BUW	1665.28	818.745	334.117	188.177	120.992	85.213	64.507	52.778	42.406	36.487	30.938	27.044	23.575	20.007	18.098	15.463	14.768	13.559	12.107	11.863
1Y4G	1647.7	816.087	301.478	155.997	97.3519	61.79	50.434	41.407	33.343	28.685	25.975	22.338	21.108	18.699	17.23	15.98	13.155	12.43	11.936	11.209
1Y4F	1665.62	826.761	309.846	157.477	97.2729	66.143	49.889	41.863	34.483	30.821	27.154	24.195	21.078	18.923	17.237	15.263	14.31	12.89	11.922	11.441
1A01	1585.24	775.981	299.07	159.582	98.5759	67.969	50.799	40.088	31.705	27.985	25.303	23.338	21.582	20.605	17.997	16.064	15.126	13.709	12.973	12.731
1Y4P	1633	812.794	301.043	153.676	93.0599	63.265	49.968	39.243	32.576	27.434	25.685	22.777	20.384	19.371	18.159	15.023	13.574	12.87	11.905	10.975
1A00	1626.01	811.527	312.188	174.423	108.84	75.6879	56.42	45.701	37.024	31.829	27.23	24.518	21.579	19.421	17.957	16.479	15.271	14.792	13.798	12.873
1AY46	1682.16	851.552	327.092	169.454	107.738	74.8619	55.921	45.672	37.072	31.227	25.449	23.238	19.395	17.696	15.536	15.034	14.317	12.872	12.133	10.729
2HHB	2006.35	696.177	222.375	112.519	61.892	41.385	29.969	21.214	18.975	15.364	13.441	11.768	9.381	8.89	7.718	7.47	7.226	6.751	6.267	5.8
1A0U	1669.82	828.413	316.999	175.442	107.754	74.9469	57.0921	45.166	40.645	32.304	28.639	24.511	22.054	19.883	18.169	17.187	16.233	14.077	13.567	12.625
1A0Z	1628.2	821.317	315.257	172.7	108.077	75.3649	56.184	45.459	39.417	31.024	26.917	23.276	20.813	18.178	16.261	15.262	14.064	13.343	13.075	12.13
1C7D	1833.71	955.994	384.028	212.884	127.455	90.1929	68.0731	51.048	41.271	32.431	27.59	22.758	20.056	17.915	16.944	15.73	13.321	12.129	11.649	10.489
1E7I	1687.49	760.251	245.62	138.974	91.2279	58.364	40.816	30.688	25.813	21.178	17.742	14.818	13.367	11.686	10.738	9.991	9.742	9.249	8.28	8.029
1UOR	1997.56	1040.91	546.303	346.476	237.772	172.626	135.415	113.039	95.24	81.568	69.9809	62.3939	57.95	53.523	49.649	43.905	40.094	37.422	34.547	32.633
1E_78	1943.67	636.011	175.209	78.6021	45.286	30.601	20.704	14.846	11.93	9.007	6.824	5.174	4.455	3.731	2.556	2.322	1.622	1.619	1.619	1.389
1AO6	1771.19	539.872	170.601	76.7331	50.04	33.297	21.504	13.942	10.732	7.836	6.384	5.182	4.455	3.511	3.036	2.565	2.327	2.324	2.324	2.323
1BM0	1774.51	528.15	164.552	78.3271	46.661	30.203	21.253	14.166	10.229	7.132	4.991	4.272	3.306	2.578	2.569	2.333	2.097	1.864	1.633	1.633
1IGY	3886.69	2303.41	1279.77	833.412	594.36	450.788	341.747	269.388	216.933	175.354	150.445	134.307	118.52	108.561	96.551	90.1478	83.4209	77.1469	72.582	66.637
1IGT	4145.46	2484.69	1360.01	890.766	627.205	468.492	374.135	299.592	246.436	203.321	172.882	150.545	130.737	118.342	105.884	97.0318	87.2649	78.2	72.505	68.4141
1HZH	4070.74	2562.5	1470.99	1007.05	737.16	573.016	452.591	381.227	320.06	272.55	239.508	209.034	186.78	168.722	153.338	139.689	130.985	122.564	112.337	105.43

## Sheet: AA_pho_ind
	AA_pho_ind_1.4A	AA_pho_ind_2A	AA_pho_ind_3A	AA_pho_ind_4A	AA_pho_ind_5A	AA_pho_ind_6A	AA_pho_ind_7A	AA_pho_ind_8A	AA_pho_ind_9A	AA_pho_ind_10A	AA_pho_ind_11A	AA_pho_ind_12A	AA_pho_ind_13A	AA_pho_ind_14A	AA_pho_ind_15A	AA_pho_ind_16A	AA_pho_ind_17A	AA_pho_ind_18A	AA_pho_ind_19A	AA_pho_ind_20A
	1.4	2	3	4	5	6	7	8	9	10	11	12	13	14	15	16	17	18	19	20
1A4V	-0.0136523	-0.0141241	-0.0143548	-0.0143895	-0.0145887	-0.0138931	-0.0144873	-0.0143134	-0.0143351	-0.0141733	-0.0141675	-0.0146099	-0.0152174	-0.0153224	-0.0151046	-0.015012	-0.0145824	-0.0146078	-0.0147318	-0.0146889
1EXS	-0.0115288	-0.0116102	-0.0111038	-0.0108067	-0.0109178	-0.0105095	-0.0107175	-0.0108279	-0.0106999	-0.010584	-0.0110582	-0.0113757	-0.0112203	-0.0113289	-0.0112152	-0.0112164	-0.0110878	-0.0113897	-0.0114481	-0.0114364
1BEB	-0.0128782	-0.013192	-0.0135426	-0.0134043	-0.0138541	-0.0137355	-0.0141082	-0.0146443	-0.0148392	-0.014901	-0.0152867	-0.0160709	-0.0162362	-0.016193	-0.0156142	-0.0154768	-0.0152517	-0.0153137	-0.0151935	-0.0151408
1LYZ	-0.012637	-0.0124874	-0.0126935	-0.0119942	-0.0115424	-0.0119579	-0.0125725	-0.0122938	-0.0125815	-0.012694	-0.01242	-0.0123719	-0.0128329	-0.0131161	-0.0123101	-0.0122191	-0.0116907	-0.0116066	-0.0108436	-0.0103644
135L	-0.0125284	-0.0125024	-0.0126009	-0.012095	-0.0118935	-0.0114138	-0.0119002	-0.011599	-0.0116646	-0.0105794	-0.0112553	-0.0119771	-0.0110065	-0.0112263	-0.0110398	-0.0107742	-0.0108971	-0.0106371	-0.0107654	-0.010767
2LYM	-0.0126633	-0.012875	-0.012971	-0.0122302	-0.0123782	-0.0124607	-0.0136278	-0.0130564	-0.0134088	-0.0138136	-0.0132935	-0.0134419	-0.0132869	-0.0129848	-0.0122395	-0.0114362	-0.0112662	-0.011527	-0.0118465	-0.0118405
2LZT	-0.0124233	-0.0126294	-0.0126304	-0.012088	-0.0120399	-0.0123741	-0.0122102	-0.0120511	-0.0123526	-0.0114516	-0.011338	-0.0121099	-0.0124433	-0.0123673	-0.0126816	-0.0129349	-0.0128055	-0.012676	-0.012434	-0.0124338
1L35	-0.0121979	-0.0120012	-0.0116772	-0.0108572	-0.0109729	-0.0103268	-0.0106498	-0.0104836	-0.0106776	-0.0100095	-0.0105458	-0.010513	-0.0110122	-0.0109947	-0.0108531	-0.0114015	-0.01099	-0.0119031	-0.0120069	-0.0110144
1LYD	-0.012643	-0.0126098	-0.0125007	-0.0119326	-0.0122021	-0.0114364	-0.0116861	-0.0115144	-0.0115595	-0.0112976	-0.0108632	-0.011221	-0.0105451	-0.00998229	-0.00987767	-0.0103493	-0.0105478	-0.0112168	-0.0120692	-0.0120719
8RAT	-0.00825025	-0.00791257	-0.00774245	-0.00732419	-0.00751462	-0.00719572	-0.00728383	-0.0073906	-0.00745506	-0.00734113	-0.00791645	-0.0075695	-0.00733227	-0.0072346	-0.00722792	-0.00738825	-0.00737446	-0.00749867	-0.00742602	-0.00753837
1RBX	-0.00831044	-0.0079514	-0.00768604	-0.00741515	-0.0076415	-0.00740965	-0.00756492	-0.00739093	-0.00749181	-0.00717764	-0.0074856	-0.00754007	-0.00731551	-0.00725729	-0.00720681	-0.00735453	-0.00735865	-0.00708454	-0.00706749	-0.0070679
3RN3	-0.00841681	-0.00796738	-0.00793255	-0.00757612	-0.00793166	-0.00774324	-0.00773822	-0.00749499	-0.00762388	-0.00758972	-0.00781592	-0.00766571	-0.00750817	-0.00743236	-0.00744734	-0.00761646	-0.00763313	-0.00768655	-0.00757624	-0.00763852
1AFU	-0.00807529	-0.00823832	-0.00809183	-0.00789019	-0.0079924	-0.00772212	-0.00804397	-0.00792203	-0.0079683	-0.00770628	-0.00816194	-0.00825677	-0.00817259	-0.0081003	-0.00787178	-0.00789721	-0.00780062	-0.00790023	-0.00780401	-0.00781853
1HHO	-0.0126152	-0.0123766	-0.0117686	-0.0110984	-0.0105888	-0.0102522	-0.0105969	-0.0102226	-0.01023	-0.0101849	-0.0104953	-0.0110797	-0.0112185	-0.0112857	-0.0109734	-0.0105686	-0.00992162	-0.0102121	-0.0106295	-0.0108549
2HCO	-0.0126057	-0.0124146	-0.011567	-0.0110698	-0.0113337	-0.0103623	-0.0103644	-0.0104502	-0.0104874	-0.0105477	-0.0108634	-0.0106152	-0.010523	-0.0104252	-0.0102948	-0.0104701	-0.01037	-0.0109266	-0.0112021	-0.0113126
2DHB	-0.0130428	-0.0130734	-0.0125238	-0.0119782	-0.0120848	-0.0117234	-0.0119367	-0.0120414	-0.0122237	-0.0118311	-0.0120711	-0.0122961	-0.012245	-0.0121205	-0.0116276	-0.0114962	-0.0113857	-0.011912	-0.0122857	-0.0120835
1BUW	-0.0127641	-0.012616	-0.0116746	-0.0108237	-0.0104577	-0.00965104	-0.00982518	-0.00931694	-0.00918199	-0.00878331	-0.00926752	-0.00944654	-0.00878634	-0.00914004	-0.00912957	-0.00941454	-0.00920092	-0.00926081	-0.00967071	-0.00971265
1Y4G	-0.0124145	-0.0123839	-0.0114831	-0.0108123	-0.010719	-0.00980052	-0.00989077	-0.00985336	-0.00940794	-0.00909453	-0.0097359	-0.00999327	-0.00946584	-0.00965018	-0.00967873	-0.00972454	-0.00955552	-0.00993106	-0.0101381	-0.0102993
1Y4F	-0.0124637	-0.0124382	-0.0115182	-0.0107175	-0.0105843	-0.0098582	-0.0101665	-0.00973811	-0.00979456	-0.00921378	-0.00990794	-0.00998438	-0.00956525	-0.00961041	-0.00987808	-0.0100334	-0.00967957	-0.00984804	-0.00992508	-0.0100196
1A01	-0.0124054	-0.0123565	-0.011284	-0.0104801	-0.0103938	-0.00959027	-0.00963695	-0.00946087	-0.00929131	-0.00895673	-0.00976891	-0.00983903	-0.00936146	-0.00931576	-0.00941936	-0.00937654	-0.00907011	-0.00952221	-0.009913	-0.00995555
1Y4P	-0.0124512	-0.0124349	-0.0115027	-0.0108913	-0.0106965	-0.00980575	-0.0100547	-0.00974139	-0.00956188	-0.00919881	-0.00981967	-0.00987404	-0.00954063	-0.00931	-0.0093859	-0.010001	-0.00981682	-0.0101942	-0.0101373	-0.0101387
1A00	-0.0123196	-0.0122434	-0.0112098	-0.0102538	-0.0101755	-0.00935716	-0.00928971	-0.00944716	-0.00910015	-0.00904038	-0.00979182	-0.0101079	-0.00965477	-0.00942907	-0.009216	-0.00948711	-0.00920861	-0.00938018	-0.00979765	-0.00979886
1AY46	-0.0123046	-0.0122704	-0.0113035	-0.0104876	-0.0103472	-0.00948453	-0.00965325	-0.00945629	-0.00915275	-0.0088247	-0.00952878	-0.00988602	-0.00917949	-0.00930355	-0.00939439	-0.00952161	-0.00938563	-0.0098461	-0.0100655	-0.00997798
2HHB	-0.0127814	-0.0129413	-0.0122994	-0.0116222	-0.0116696	-0.0108019	-0.0111898	-0.0105448	-0.0105575	-0.00970283	-0.0100123	-0.0103193	-0.0100457	-0.0098514	-0.00924064	-0.00938405	-0.00892794	-0.00863562	-0.00902223	-0.00913187
1A0U	-0.0126792	-0.0126929	-0.0118719	-0.0111732	-0.0111962	-0.0105683	-0.0107654	-0.0104159	-0.0102249	-0.00985688	-0.010346	-0.0101053	-0.00947173	-0.0096211	-0.0097801	-0.00988341	-0.00985148	-0.0095691	-0.00977724	-0.00977027
1A0Z	-0.0127134	-0.0127557	-0.0119211	-0.0111992	-0.011072	-0.010461	-0.0104015	-0.0104745	-0.0102922	-0.00961461	-0.00976713	-0.00972734	-0.00918202	-0.00915211	-0.00917081	-0.00923278	-0.00924081	-0.00941217	-0.00972587	-0.00972442
1C7D	-0.0125652	-0.0126817	-0.0125595	-0.012448	-0.013082	-0.0132019	-0.0142005	-0.0147225	-0.0149742	-0.0157545	-0.0149313	-0.0150238	-0.0153397	-0.0152916	-0.0149543	-0.0149569	-0.0144273	-0.0143692	-0.0146624	-0.0146268
1E7I	-0.0109291	-0.0106886	-0.00957722	-0.0090434	-0.00878415	-0.00788052	-0.00759096	-0.00754529	-0.00732284	-0.00704005	-0.007946	-0.00818847	-0.00753695	-0.0074789	-0.00747364	-0.00758838	-0.00753685	-0.00780156	-0.00817167	-0.00818832
1UOR	-0.0116515	-0.012239	-0.0123954	-0.0123395	-0.0125638	-0.0120417	-0.0125231	-0.0124076	-0.0123514	-0.0121138	-0.0123905	-0.0125195	-0.0124092	-0.0126715	-0.0125221	-0.0127517	-0.0123178	-0.0124241	-0.0124563	-0.012807
1E_78	-0.0114163	-0.0113138	-0.00993579	-0.00865131	-0.00852986	-0.008218	-0.00804816	-0.00778632	-0.00740697	-0.00661935	-0.00666293	-0.00692093	-0.00604957	-0.00659705	-0.00636008	-0.0070563	-0.00703289	-0.00729545	-0.00763891	-0.00763891
1AO6	-0.0114585	-0.0110126	-0.0101141	-0.00941531	-0.00956997	-0.00922892	-0.0096523	-0.00941858	-0.00922208	-0.00945616	-0.0106771	-0.0105618	-0.0101896	-0.0110313	-0.0115032	-0.010491	-0.0105971	-0.0108699	-0.0111196	-0.0111173
1BM0	-0.0114727	-0.0110162	-0.0101063	-0.00937392	-0.0097899	-0.00942719	-0.00964565	-0.00981454	-0.00959809	-0.00965259	-0.00920374	-0.00969497	-0.00983637	-0.00965517	-0.00953034	-0.00989958	-0.0100151	-0.00955948	-0.0101501	-0.0101501
1IGY	-0.0103392	-0.0103646	-0.010239	-0.00991461	-0.00986086	-0.00930297	-0.00931181	-0.00915545	-0.0089662	-0.00835519	-0.00874687	-0.00870612	-0.00834206	-0.00811139	-0.00791938	-0.00789035	-0.00773116	-0.00776926	-0.00772817	-0.00759075
1IGT	-0.0113788	-0.0117028	-0.0117555	-0.0114158	-0.0115381	-0.0109981	-0.0111116	-0.0108417	-0.0106323	-0.0102784	-0.010383	-0.0105222	-0.0104379	-0.0103294	-0.0100854	-0.0101387	-0.0100531	-0.010077	-0.00997014	-0.00999134
1HZH	-0.0113362	-0.0114636	-0.0112505	-0.0109035	-0.0111201	-0.010877	-0.0114913	-0.0115751	-0.0118325	-0.011908	-0.0120169	-0.0122663	-0.0126498	-0.0126638	-0.0124238	-0.0125891	-0.012429	-0.0126618	-0.012872	-0.0129614

## Sheet: AA_pho_pat
	AA_pho_pat_1.4A	AA_pho_pat_2A	AA_pho_pat_3A	AA_pho_pat_4A	AA_pho_pat_5A	AA_pho_pat_6A	AA_pho_pat_7A	AA_pho_pat_8A	AA_pho_pat_9A	AA_pho_pat_10A	AA_pho_pat_11A	AA_pho_pat_12A	AA_pho_pat_13A	AA_pho_pat_14A	AA_pho_pat_15A	AA_pho_pat_16A	AA_pho_pat_17A	AA_pho_pat_18A	AA_pho_pat_19A	AA_pho_pat_20A
	1.4	2	3	4	5	6	7	8	9	10	11	12	13	14	15	16	17	18	19	20
1A4V	-0.00356934	-0.00362786	-0.00363494	-0.00359305	-0.0036006	-0.00339804	-0.00351881	-0.00345384	-0.00344367	-0.00339333	-0.00338336	-0.00347356	-0.00360903	-0.00363008	-0.00357372	-0.00354222	-0.00343124	-0.00343074	-0.0034527	-0.00344151
1EXS	-0.00302484	-0.00298351	-0.00280298	-0.00268885	-0.0026874	-0.00256692	-0.00260312	-0.00261594	-0.00257609	-0.00254058	-0.00264928	-0.00271497	-0.00266892	-0.0026914	-0.00266309	-0.00265791	-0.00262435	-0.0026949	-0.00270267	-0.00270072
1BEB	-0.00338167	-0.0033979	-0.00341709	-0.00333831	-0.00341821	-0.00336061	-0.00343028	-0.00354121	-0.00357377	-0.00358266	-0.00366653	-0.00385017	-0.00387348	-0.00385685	-0.00371147	-0.0036775	-0.00361983	-0.00363186	-0.00360286	-0.00358925
1LYZ	-0.00331825	-0.00322124	-0.00318121	-0.00295308	-0.00280914	-0.0028824	-0.00301073	-0.00293241	-0.00298925	-0.00299979	-0.0029315	-0.00291501	-0.00301779	-0.00308603	-0.00287988	-0.00284417	-0.00271882	-0.00269969	-0.00252322	-0.00239849
135L	-0.00332846	-0.0032412	-0.00317057	-0.00299256	-0.0029024	-0.00275493	-0.00284695	-0.00276316	-0.00276485	-0.00250014	-0.00265331	-0.00281529	-0.00257773	-0.00262535	-0.002577	-0.0025162	-0.00252812	-0.00246685	-0.00249659	-0.00249304
2LYM	-0.00335617	-0.00333559	-0.00325982	-0.00302085	-0.00301377	-0.00300108	-0.00325815	-0.0031002	-0.0031662	-0.00324832	-0.00311978	-0.00314467	-0.00309117	-0.00301507	-0.0028387	-0.00265091	-0.00260699	-0.00266388	-0.00273417	-0.00273042
2LZT	-0.00329029	-0.00327207	-0.00317618	-0.00298575	-0.00293273	-0.0029803	-0.00292098	-0.00286998	-0.00292546	-0.00270295	-0.00266761	-0.00283976	-0.00291232	-0.00288864	-0.00295682	-0.00300546	-0.002976	-0.00294263	-0.00288757	-0.00288561
1L35	-0.00322793	-0.00311475	-0.00294487	-0.00269016	-0.00269033	-0.00251051	-0.00256768	-0.00251207	-0.00254866	-0.00238048	-0.00250384	-0.00248797	-0.00260066	-0.00259827	-0.00256045	-0.00269335	-0.00259143	-0.00279871	-0.00282013	-0.00258499
1LYD	-0.00334971	-0.00328193	-0.0031567	-0.00295539	-0.0029846	-0.00277173	-0.00281577	-0.00275057	-0.00274217	-0.00266883	-0.0025578	-0.00262923	-0.00246606	-0.00231889	-0.00228964	-0.00239183	-0.00242863	-0.00257986	-0.00277591	-0.00277453
8RAT	-0.00217576	-0.00205295	-0.00194547	-0.00180529	-0.00182541	-0.00172959	-0.00174048	-0.00175404	-0.00176168	-0.00172957	-0.00186422	-0.00177356	-0.00171552	-0.00168841	-0.00168383	-0.00171808	-0.00171241	-0.00173755	-0.00171727	-0.0017427
1RBX	-0.0021932	-0.00205582	-0.00192952	-0.0018264	-0.00185613	-0.00178161	-0.0018079	-0.00175583	-0.00177256	-0.00169303	-0.00176053	-0.00176782	-0.0017132	-0.00169874	-0.00168559	-0.00171756	-0.00171192	-0.00164916	-0.0016437	-0.00164144
3RN3	-0.00221956	-0.00206666	-0.00199479	-0.00186732	-0.00192792	-0.00186447	-0.00185114	-0.00178167	-0.00180398	-0.0017888	-0.00183935	-0.00179492	-0.00175652	-0.00173339	-0.00173011	-0.00176753	-0.00176762	-0.00177889	-0.00175173	-0.0017645
1AFU	-0.00211521	-0.00211406	-0.00203535	-0.00195514	-0.00195545	-0.0018728	-0.00193689	-0.00189673	-0.00189933	-0.00183134	-0.00193652	-0.00195276	-0.00192916	-0.00190754	-0.00185146	-0.00185482	-0.00182934	-0.00184959	-0.00182572	-0.00182763
1HHO	-0.00335878	-0.00321679	-0.00296862	-0.00274542	-0.00258283	-0.00247918	-0.00254238	-0.00244086	-0.00242938	-0.00240777	-0.00247106	-0.00260415	-0.00263252	-0.00264515	-0.00257327	-0.00247499	-0.00232262	-0.00238758	-0.00248237	-0.00253461
2HCO	-0.00335874	-0.00322654	-0.002918	-0.00273957	-0.00276748	-0.00250647	-0.00248448	-0.00249441	-0.00249577	-0.00250266	-0.00257127	-0.0025077	-0.00248491	-0.00245557	-0.00242203	-0.00245891	-0.00243244	-0.00256275	-0.00262491	-0.00264406
2DHB	-0.00348216	-0.00340091	-0.00316354	-0.00296658	-0.00295377	-0.00283723	-0.00286901	-0.00287597	-0.00290606	-0.0028033	-0.00284958	-0.00289876	-0.00288292	-0.00284912	-0.00272957	-0.00269849	-0.00266739	-0.00278931	-0.00287513	-0.00282724
1BUW	-0.00335316	-0.00324616	-0.00294391	-0.00269772	-0.00257699	-0.00235643	-0.00238268	-0.00224534	-0.00219984	-0.00209462	-0.00220553	-0.00224099	-0.00207138	-0.00215135	-0.0021458	-0.00220571	-0.00215681	-0.00216496	-0.0022516	-0.00225924
1Y4G	-0.00325982	-0.0031841	-0.0028994	-0.00269439	-0.0026418	-0.00239357	-0.00239823	-0.00237208	-0.00225675	-0.00217397	-0.00232009	-0.00237478	-0.002245	-0.00228416	-0.00228444	-0.00228527	-0.00224469	-0.00232912	-0.00237271	-0.0024051
1Y4F	-0.00327234	-0.00319858	-0.00290625	-0.00267051	-0.00260649	-0.00240609	-0.00246213	-0.00234291	-0.00234546	-0.00220138	-0.00236	-0.00236836	-0.00226535	-0.00227322	-0.00233244	-0.002356	-0.00227073	-0.00230802	-0.00232013	-0.00233947
1A01	-0.00325858	-0.00317918	-0.00284786	-0.00261318	-0.00256143	-0.00234475	-0.00234233	-0.00228475	-0.00223167	-0.00214234	-0.00233191	-0.0023431	-0.00222021	-0.00220633	-0.00223053	-0.00221507	-0.00214366	-0.00225069	-0.00233821	-0.00234711
1Y4P	-0.00326842	-0.0031974	-0.0029026	-0.0027127	-0.00263338	-0.00239521	-0.0024389	-0.00234529	-0.00229035	-0.00219444	-0.00233535	-0.00234272	-0.00226135	-0.00219932	-0.00221349	-0.00234759	-0.00229747	-0.00238545	-0.00236637	-0.00236749
1A00	-0.00323562	-0.00314925	-0.00282908	-0.00255865	-0.00251133	-0.00229199	-0.00225916	-0.00228436	-0.00218782	-0.00216351	-0.00233887	-0.00240606	-0.00228945	-0.00223319	-0.00217752	-0.0022334	-0.00216346	-0.00220241	-0.00229132	-0.00229347
1AY46	-0.00322806	-0.00315486	-0.00285064	-0.00260963	-0.00254516	-0.0023128	-0.00233688	-0.0022731	-0.0021891	-0.00210358	-0.00226634	-0.0023442	-0.00217117	-0.00219514	-0.00221138	-0.00223669	-0.00220285	-0.00230435	-0.00234856	-0.00232726
2HHB	-0.00340737	-0.0033655	-0.00310803	-0.00288044	-0.00285477	-0.00261425	-0.00268277	-0.00251344	-0.00250411	-0.00229345	-0.00236098	-0.00242875	-0.00235597	-0.00230471	-0.00216119	-0.00219059	-0.00208107	-0.00201031	-0.00209416	-0.00211859
1A0U	-0.00333103	-0.00326654	-0.00299632	-0.00278443	-0.00276073	-0.00258844	-0.0026154	-0.00251575	-0.00245911	-0.00235864	-0.00246916	-0.00240476	-0.00224612	-0.00227734	-0.00230772	-0.00232693	-0.00231767	-0.00224507	-0.00228703	-0.00228425
1A0Z	-0.00333816	-0.00327901	-0.00300899	-0.00279494	-0.00273203	-0.00255972	-0.00252987	-0.00253278	-0.00247372	-0.00229449	-0.00232657	-0.00231034	-0.00217165	-0.00216061	-0.00216125	-0.00216786	-0.00216605	-0.00220327	-0.00227082	-0.00226841
1C7D	-0.0032925	-0.0032503	-0.00316483	-0.00309939	-0.00321885	-0.00321815	-0.0034401	-0.00354507	-0.00359303	-0.00375688	-0.00355135	-0.00356159	-0.00361945	-0.00360459	-0.00351924	-0.00351151	-0.00337169	-0.00335162	-0.00341604	-0.00340935
1E7I	-0.00286199	-0.00274249	-0.00241515	-0.00224829	-0.00216	-0.00192443	-0.00184424	-0.00182323	-0.00176658	-0.00169425	-0.00190511	-0.00195704	-0.00179904	-0.00178364	-0.00178338	-0.00180513	-0.00179083	-0.00185017	-0.00193318	-0.00193365
1UOR	-0.00305081	-0.00314094	-0.00312202	-0.00306915	-0.00308926	-0.00293603	-0.00303366	-0.00299051	-0.00296308	-0.00289764	-0.00295938	-0.00298146	-0.00294717	-0.00300097	-0.00296052	-0.00301001	-0.00290511	-0.00292412	-0.00292739	-0.0030067
1E_78	-0.00301777	-0.00294184	-0.00250842	-0.00214514	-0.00208802	-0.00199587	-0.00193755	-0.00186445	-0.0017673	-0.00156896	-0.00156786	-0.00162768	-0.00141847	-0.00153835	-0.00147785	-0.00163847	-0.00162962	-0.00168733	-0.00176677	-0.00176841
1AO6	-0.00303547	-0.00286526	-0.00255627	-0.00233808	-0.00234746	-0.00224303	-0.00233217	-0.00226403	-0.00219936	-0.00224541	-0.00252454	-0.00248778	-0.00238919	-0.00258207	-0.00268643	-0.00244632	-0.00246594	-0.00252617	-0.00258418	-0.00258255
1BM0	-0.00304448	-0.0028661	-0.00255456	-0.0023309	-0.00240424	-0.0022962	-0.00232954	-0.00235649	-0.00228323	-0.00229474	-0.00218742	-0.00230094	-0.00232279	-0.00226282	-0.00222577	-0.00230957	-0.00233351	-0.00222736	-0.00236787	-0.00236787
1IGY	-0.002709	-0.00265767	-0.00258707	-0.00247246	-0.00243191	-0.00227422	-0.00226336	-0.00221199	-0.00215878	-0.00200701	-0.00209542	-0.0020806	-0.00198934	-0.0019311	-0.00188331	-0.00187184	-0.00183222	-0.00183857	-0.00182712	-0.00179371
1IGT	-0.00298678	-0.00301137	-0.00296945	-0.00284124	-0.00283907	-0.00268361	-0.00269426	-0.00261311	-0.00255129	-0.00245861	-0.00247591	-0.00250249	-0.00247661	-0.00244479	-0.00238366	-0.00239362	-0.00237103	-0.00237356	-0.00234703	-0.00234896
1HZH	-0.00296916	-0.00293843	-0.00284256	-0.0027186	-0.00274248	-0.002659	-0.00279017	-0.00279287	-0.00284103	-0.00284946	-0.00286667	-0.00291704	-0.00299841	-0.0029967	-0.00293535	-0.00297054	-0.00292807	-0.00297864	-0.00302511	-0.00304347

## Sheet: AA_T_pho_den
	AA_T_pho_den_1.4A	AA_T_pho_den_2A	AA_T_pho_den_3A	AA_T_pho_den_4A	AA_T_pho_den_5A	AA_T_pho_den_6A	AA_T_pho_den_7A	AA_T_pho_den_8A	AA_T_pho_den_9A	AA_T_pho_den_10A	AA_T_pho_den_11A	AA_T_pho_den_12A	AA_T_pho_den_13A	AA_T_pho_den_14A	AA_T_pho_den_15A	AA_T_pho_den_16A	AA_T_pho_den_17A	AA_T_pho_den_18A	AA_T_pho_den_19A	AA_T_pho_den_20A
	1.4	2	3	4	5	6	7	8	9	10	11	12	13	14	15	16	17	18	19	20
1A4V	-0.00370065	-0.00354056	-0.00321574	-0.0030542	-0.00296503	-0.00263193	-0.00269467	-0.00247862	-0.00240562	-0.00239696	-0.00241965	-0.0024127	-0.00242303	-0.00226115	-0.00224322	-0.0020588	-0.00198681	-0.00187645	-0.00190438	-0.00181022
1EXS	-0.00313103	-0.00290868	-0.00253385	-0.00239617	-0.00248054	-0.00232733	-0.00241017	-0.00253409	-0.00254773	-0.00255886	-0.00275561	-0.00285942	-0.00279389	-0.00282967	-0.00280466	-0.0027733	-0.00275079	-0.00282627	-0.00274935	-0.00274463
1BEB	-0.00220709	-0.00171084	-0.00137057	-0.00117405	-0.00111304	-0.00105399	-0.00101891	-0.000961465	-0.000923427	-0.000936343	-0.000971395	-0.000990425	-0.000997419	-0.000964848	-0.00093464	-0.000851587	-0.000847915	-0.00084185	-0.000833258	-0.000829296
1LYZ	-0.00297574	-0.00198223	-0.00179417	-0.00148338	-0.00128571	-0.00115909	-0.00110081	-0.00102226	-0.000991609	-0.000966212	-0.000889875	-0.000791104	-0.000843069	-0.000787337	-0.000674647	-0.000682123	-0.000639563	-0.000628273	-0.000540554	-0.000495941
135L	-0.00271407	-0.00187724	-0.00157486	-0.001273	-0.000997822	-0.000862336	-0.000807809	-0.000719827	-0.000709912	-0.000583155	-0.00057031	-0.000529293	-0.000452392	-0.000469363	-0.000500533	-0.000480832	-0.000476232	-0.000458452	-0.000481326	-0.000495277
2LYM	-0.00269726	-0.00188114	-0.00149536	-0.00111472	-0.000987704	-0.000855169	-0.000858253	-0.000751966	-0.000705279	-0.000702624	-0.000549357	-0.000561413	-0.000567308	-0.000530952	-0.000503532	-0.000357385	-0.000369372	-0.000403411	-0.000435849	-0.000454079
2LZT	-0.00265619	-0.00184366	-0.00145376	-0.00114611	-0.00102468	-0.000934369	-0.000796636	-0.000737509	-0.000750151	-0.000676013	-0.00061836	-0.000639172	-0.000674072	-0.000712347	-0.000701631	-0.000684899	-0.000641297	-0.000626045	-0.000605077	-0.000626364
1L35	-0.00296119	-0.00207663	-0.00172762	-0.00131269	-0.00118082	-0.000990947	-0.000969745	-0.000886923	-0.000845295	-0.000764634	-0.000794642	-0.000763459	-0.000773937	-0.000766717	-0.000724165	-0.000706315	-0.000655295	-0.000600637	-0.000637588	-0.000515792
1LYD	-0.00311988	-0.00221352	-0.00183453	-0.00149991	-0.00135356	-0.0011141	-0.00102439	-0.000863783	-0.000764594	-0.000742315	-0.000450128	-0.000378656	-0.000342656	-0.000251102	-0.000263004	-0.000267698	-0.00025463	-0.000249162	-0.000241488	-0.000249079
8RAT	-0.00138633	-0.00102107	-0.000816878	-0.00068654	-0.000696547	-0.000615996	-0.000589619	-0.000616101	-0.000649801	-0.000637939	-0.000665896	-0.00057203	-0.000569278	-0.000570799	-0.000561772	-0.000566888	-0.000590716	-0.000554824	-0.000555849	-0.000510412
1RBX	-0.00145746	-0.000967905	-0.000839576	-0.000689808	-0.000664759	-0.000655212	-0.000622336	-0.000598145	-0.000596844	-0.000575824	-0.000609744	-0.000635057	-0.000604582	-0.000547667	-0.000590614	-0.000609796	-0.000627645	-0.000586898	-0.000571275	-0.000593628
3RN3	-0.00132371	-0.000879776	-0.000701981	-0.000573803	-0.000522569	-0.000508184	-0.000499491	-0.000482252	-0.000491514	-0.000477431	-0.000452838	-0.000355638	-0.000354572	-0.000358772	-0.000346815	-0.00035219	-0.000353255	-0.000382615	-0.000396987	-0.000383055
1AFU	-0.00106945	-0.000958022	-0.000801635	-0.000744272	-0.000730318	-0.000711029	-0.000732645	-0.000719595	-0.000695948	-0.000708897	-0.000719291	-0.000722781	-0.000692889	-0.000683914	-0.000633688	-0.000612993	-0.000618922	-0.000628603	-0.000636147	-0.000653826
1HHO	-0.0033695	-0.00224742	-0.00146915	-0.00114692	-0.000972897	-0.000846117	-0.00079744	-0.000741309	-0.000736731	-0.000700468	-0.000690048	-0.000654119	-0.000646088	-0.000630473	-0.000604735	-0.000540746	-0.000508105	-0.000536152	-0.000544285	-0.000537854
2HCO	-0.00344043	-0.00227205	-0.0014554	-0.00114241	-0.00101463	-0.000862981	-0.000841304	-0.0008303	-0.000768753	-0.000786521	-0.000799974	-0.000671355	-0.000647696	-0.000661674	-0.0005995	-0.000635793	-0.000651302	-0.000653356	-0.000682921	-0.000703107
2DHB	-0.00366168	-0.002601	-0.00175944	-0.00139168	-0.0013119	-0.00119005	-0.00113761	-0.00106475	-0.00114691	-0.0011246	-0.00110536	-0.00108339	-0.00104748	-0.00098292	-0.000935584	-0.000841555	-0.000866042	-0.000899487	-0.000943751	-0.000908855
1BUW	-0.00250682	-0.00189289	-0.00121817	-0.000937451	-0.000790514	-0.000652014	-0.000617023	-0.000568208	-0.000521041	-0.000492453	-0.000494323	-0.000489816	-0.000440956	-0.00042444	-0.000411256	-0.00038794	-0.000387949	-0.000384505	-0.00038441	-0.000390741
1Y4G	-0.00238281	-0.00181616	-0.00106944	-0.000782457	-0.000658445	-0.000488956	-0.000493165	-0.000478682	-0.00042713	-0.00040122	-0.000433813	-0.00042705	-0.000419868	-0.000411746	-0.000415794	-0.000415049	-0.000355844	-0.000371286	-0.000387459	-0.000384846
1Y4F	-0.00240837	-0.00184403	-0.00109625	-0.000783136	-0.00065033	-0.000523923	-0.000503463	-0.00047804	-0.000456686	-0.000435113	-0.000463225	-0.00046114	-0.000422976	-0.000411836	-0.000413555	-0.00039973	-0.000384539	-0.000372015	-0.000373689	-0.000381646
1A01	-0.00233651	-0.00175466	-0.00104263	-0.000772895	-0.000643739	-0.000518741	-0.000475822	-0.00043936	-0.000396115	-0.000386743	-0.000431127	-0.000438978	-0.000423799	-0.000437538	-0.000414912	-0.000393306	-0.000385172	-0.0003896	-0.000406313	-0.000421423
1Y4P	-0.00236572	-0.00180818	-0.00106519	-0.000776574	-0.000626655	-0.000498906	-0.000497389	-0.000446301	-0.000421211	-0.000388696	-0.000432957	-0.00042954	-0.000407976	-0.000413591	-0.000420501	-0.00039943	-0.000380857	-0.000395202	-0.000389024	-0.000373388
1A00	-0.00238009	-0.00181037	-0.00109078	-0.000821209	-0.000688559	-0.000564269	-0.000514969	-0.000501014	-0.000452017	-0.000438946	-0.000457583	-0.000470085	-0.000432152	-0.00041216	-0.000400952	-0.000405024	-0.000391322	-0.00040924	-0.000423852	-0.000413576
1AY46	-0.00241166	-0.00187228	-0.0011355	-0.000825329	-0.000699388	-0.000569968	-0.000533796	-0.000505945	-0.000458839	-0.000425366	-0.00042235	-0.000442667	-0.000376248	-0.00037565	-0.000360678	-0.000379159	-0.00038012	-0.000381068	-0.000392654	-0.000360454
2HHB	-0.00347426	-0.00228396	-0.00129714	-0.000970845	-0.000761089	-0.000614243	-0.000570767	-0.000460043	-0.000486049	-0.000410963	-0.000422595	-0.000419843	-0.000352955	-0.000362947	-0.000318634	-0.000337835	-0.000336366	-0.000326229	-0.000335887	-0.000331733
1A0U	-0.00252587	-0.00192907	-0.00118316	-0.000911746	-0.00076377	-0.000639621	-0.000607578	-0.000553917	-0.000560364	-0.000491605	-0.000508681	-0.000476071	-0.000442059	-0.000439014	-0.000440995	-0.000444066	-0.000449308	-0.000405225	-0.000422007	-0.000408704
1A0Z	-0.00245761	-0.00191103	-0.00116773	-0.000896141	-0.00074632	-0.000629113	-0.000573971	-0.000551874	-0.000538825	-0.000453584	-0.000448451	-0.000430545	-0.000397532	-0.00037719	-0.000366019	-0.000372952	-0.000366218	-0.000374876	-0.000400651	-0.00039251
1C7D	-0.0024975	-0.00200551	-0.00133852	-0.00107159	-0.000917244	-0.000834378	-0.000831049	-0.000772467	-0.000741957	-0.000691327	-0.000627247	-0.000574299	-0.000569256	-0.000550962	-0.00055226	-0.00054909	-0.000478439	-0.000456659	-0.000475543	-0.000448173
1E7I	-0.00211943	-0.00151422	-0.000798283	-0.000636748	-0.000557114	-0.000418893	-0.000348187	-0.000313613	-0.000303158	-0.000275033	-0.000295106	-0.000285399	-0.000263391	-0.000250914	-0.000252569	-0.000255082	-0.000265393	-0.000280357	-0.000277394	-0.000285574
1UOR	-0.00266571	-0.00242987	-0.00226222	-0.00214899	-0.00207125	-0.0018964	-0.00192688	-0.00192877	-0.00191374	-0.00184837	-0.00185282	-0.00187498	-0.00192064	-0.00197271	-0.00198179	-0.00195131	-0.00185648	-0.00186824	-0.00183709	-0.00187861
1E_78	-0.0028033	-0.00173042	-0.000847069	-0.000533013	-0.000430383	-0.000368772	-0.000305133	-0.000262637	-0.00024153	-0.000191382	-0.000166861	-0.000147639	-0.000122248	-0.000121318	-8.94182e-05	-9.71957e-05	-7.31328e-05	-8.22458e-05	-9.21145e-05	-8.4792e-05
1AO6	-0.00262947	-0.00150949	-0.000879238	-0.000589171	-0.000541223	-0.000457261	-0.000393475	-0.000306161	-0.00027253	-0.000237061	-0.000249793	-0.000229614	-0.000209244	-0.000199508	-0.000199498	-0.000165571	-0.000163761	-0.000180843	-0.000197288	-0.000209098
1BM0	-0.00265271	-0.00149238	-0.000850027	-0.000592277	-0.000519768	-0.000428667	-0.000387261	-0.000321937	-0.000271205	-0.000222331	-0.000170955	-0.000174278	-0.000150936	-0.000128147	-0.000136016	-0.000139446	-0.000138362	-0.000126234	-0.000125377	-0.000132389
1IGY	-0.00210463	-0.00191034	-0.00174421	-0.00161479	-0.00155452	-0.00144174	-0.00137135	-0.00129721	-0.00123497	-0.00109549	-0.00112538	-0.001123	-0.00106771	-0.0010588	-0.001008	-0.00101526	-0.0010118	-0.00101621	-0.00102023	-0.000964351
1IGT	-0.00236477	-0.00222863	-0.00203586	-0.00189993	-0.00183107	-0.00168666	-0.00169347	-0.00161021	-0.00153995	-0.00143145	-0.00140186	-0.00139505	-0.00134379	-0.00133368	-0.00127938	-0.00127694	-0.00125681	-0.00121944	-0.0011873	-0.0012013
1HZH	-0.0022085	-0.00209754	-0.00193661	-0.00188134	-0.0018982	-0.00185622	-0.00192518	-0.00195373	-0.00197842	-0.0019646	-0.00197351	-0.00198756	-0.00205519	-0.0020503	-0.00199663	-0.00200572	-0.0020218	-0.00208728	-0.00202401	-0.00203384

## Sheet: AA_S_pho_den
	AA_S_pho_den_1.4A	AA_S_pho_den_2A	AA_S_pho_den_3A	AA_S_pho_den_4A	AA_S_pho_den_5A	AA_S_pho_den_6A	AA_S_pho_den_7A	AA_S_pho_den_8A	AA_S_pho_den_9A	AA_S_pho_den_10A	AA_S_pho_den_11A	AA_S_pho_den_12A	AA_S_pho_den_13A	AA_S_pho_den_14A	AA_S_pho_den_15A	AA_S_pho_den_16A	AA_S_pho_den_17A	AA_S_pho_den_18A	AA_S_pho_den_19A	AA_S_pho_den_20A
	1.4	2	3	4	5	6	7	8	9	10	11	12	13	14	15	16	17	18	19	20
1A4V	-0.0136523	-0.0141241	-0.0143548	-0.0143895	-0.0145887	-0.0138931	-0.0144873	-0.0143134	-0.0143351	-0.0141733	-0.0141675	-0.0146099	-0.0152174	-0.0153224	-0.0151046	-0.015012	-0.0145824	-0.0146078	-0.0147318	-0.0146889
1EXS	-0.0115288	-0.0116102	-0.0111038	-0.0108067	-0.0109178	-0.0105095	-0.0107175	-0.0108279	-0.0107	-0.010584	-0.0110582	-0.0113757	-0.0112203	-0.0113289	-0.0112152	-0.0112164	-0.0110878	-0.0113897	-0.0114481	-0.0114364
1BEB	-0.0128782	-0.013192	-0.0135426	-0.0134043	-0.0138541	-0.0137355	-0.0141082	-0.0146443	-0.0148392	-0.014901	-0.0152867	-0.0160709	-0.0162362	-0.016193	-0.0156142	-0.0154768	-0.0152517	-0.0153137	-0.0151935	-0.0151408
1LYZ	-0.012637	-0.0124874	-0.0126935	-0.0119942	-0.0115424	-0.0119579	-0.0125725	-0.0122938	-0.0125815	-0.012694	-0.01242	-0.0123719	-0.0128329	-0.0131161	-0.0123101	-0.0122191	-0.0116907	-0.0116066	-0.0108436	-0.0103644
135L	-0.0125284	-0.0125024	-0.0126009	-0.012095	-0.0118935	-0.0114138	-0.0119002	-0.011599	-0.0116646	-0.0105794	-0.0112553	-0.0119771	-0.0110065	-0.0112263	-0.0110398	-0.0107742	-0.0108971	-0.0106371	-0.0107654	-0.010767
2LYM	-0.0126633	-0.012875	-0.012971	-0.0122302	-0.0123782	-0.0124607	-0.0136278	-0.0130564	-0.0134088	-0.0138136	-0.0132935	-0.0134419	-0.0132869	-0.0129848	-0.0122395	-0.0114362	-0.0112662	-0.011527	-0.0118465	-0.0118405
2LZT	-0.0124233	-0.0126294	-0.0126304	-0.012088	-0.0120399	-0.0123741	-0.0122102	-0.0120511	-0.0123526	-0.0114516	-0.011338	-0.0121099	-0.0124433	-0.0123673	-0.0126816	-0.0129349	-0.0128055	-0.012676	-0.012434	-0.0124338
1L35	-0.0121979	-0.0120012	-0.0116772	-0.0108572	-0.0109729	-0.0103267	-0.0106498	-0.0104836	-0.0106776	-0.0100095	-0.0105458	-0.010513	-0.0110122	-0.0109947	-0.0108531	-0.0114015	-0.01099	-0.0119031	-0.0120069	-0.0110144
1LYD	-0.012643	-0.0126098	-0.0125007	-0.0119326	-0.0122021	-0.0114364	-0.0116861	-0.0115144	-0.0115595	-0.0112976	-0.0108632	-0.011221	-0.0105451	-0.00998229	-0.00987767	-0.0103493	-0.0105478	-0.0112168	-0.0120692	-0.0120719
8RAT	-0.00825025	-0.00791258	-0.00774245	-0.00732419	-0.00751462	-0.00719572	-0.00728383	-0.0073906	-0.00745506	-0.00734113	-0.00791645	-0.0075695	-0.00733227	-0.0072346	-0.00722792	-0.00738825	-0.00737446	-0.00749867	-0.00742602	-0.00753838
1RBX	-0.00831043	-0.0079514	-0.00768604	-0.00741515	-0.0076415	-0.00740966	-0.00756492	-0.00739093	-0.00749181	-0.00717764	-0.0074856	-0.00754007	-0.00731551	-0.00725729	-0.00720681	-0.00735452	-0.00735865	-0.00708454	-0.00706749	-0.0070679
3RN3	-0.00841681	-0.00796738	-0.00793255	-0.00757611	-0.00793166	-0.00774323	-0.00773822	-0.00749499	-0.00762389	-0.00758972	-0.00781592	-0.00766571	-0.00750817	-0.00743236	-0.00744734	-0.00761646	-0.00763313	-0.00768655	-0.00757624	-0.00763852
1AFU	-0.00807529	-0.00823832	-0.00809183	-0.00789019	-0.0079924	-0.00772212	-0.00804397	-0.00792203	-0.0079683	-0.00770628	-0.00816194	-0.00825676	-0.00817259	-0.0081003	-0.00787178	-0.0078972	-0.00780062	-0.00790024	-0.00780401	-0.00781853
1HHO	-0.0126152	-0.0123767	-0.0117686	-0.0110984	-0.0105888	-0.0102522	-0.0105969	-0.0102226	-0.01023	-0.0101849	-0.0104953	-0.0110797	-0.0112185	-0.0112857	-0.0109734	-0.0105686	-0.00992162	-0.0102121	-0.0106295	-0.0108549
2HCO	-0.0126057	-0.0124146	-0.011567	-0.0110698	-0.0113337	-0.0103623	-0.0103644	-0.0104502	-0.0104874	-0.0105477	-0.0108634	-0.0106152	-0.010523	-0.0104252	-0.0102948	-0.0104701	-0.01037	-0.0109266	-0.0112021	-0.0113126
2DHB	-0.0130428	-0.0130734	-0.0125238	-0.0119782	-0.0120847	-0.0117234	-0.0119367	-0.0120414	-0.0122237	-0.0118311	-0.0120711	-0.0122961	-0.012245	-0.0121205	-0.0116276	-0.0114962	-0.0113857	-0.011912	-0.0122857	-0.0120835
1BUW	-0.0127641	-0.012616	-0.0116746	-0.0108237	-0.0104577	-0.00965104	-0.00982518	-0.00931694	-0.00918199	-0.00878331	-0.00926752	-0.00944654	-0.00878634	-0.00914004	-0.00912957	-0.00941454	-0.00920092	-0.00926082	-0.00967071	-0.00971264
1Y4G	-0.0124145	-0.0123839	-0.0114831	-0.0108123	-0.010719	-0.00980052	-0.00989077	-0.00985336	-0.00940794	-0.00909453	-0.0097359	-0.00999327	-0.00946584	-0.00965018	-0.00967873	-0.00972454	-0.00955552	-0.00993106	-0.0101381	-0.0102993
1Y4F	-0.0124637	-0.0124382	-0.0115182	-0.0107175	-0.0105843	-0.0098582	-0.0101665	-0.00973811	-0.00979456	-0.00921378	-0.00990794	-0.00998438	-0.00956525	-0.00961041	-0.00987808	-0.0100334	-0.00967957	-0.00984804	-0.00992509	-0.0100196
1A01	-0.0124054	-0.0123565	-0.011284	-0.0104801	-0.0103938	-0.00959027	-0.00963695	-0.00946087	-0.00929131	-0.00895673	-0.00976891	-0.00983903	-0.00936146	-0.00931576	-0.00941936	-0.00937654	-0.00907011	-0.0095222	-0.009913	-0.00995555
1Y4P	-0.0124512	-0.0124349	-0.0115027	-0.0108913	-0.0106965	-0.00980575	-0.0100547	-0.00974139	-0.00956188	-0.00919881	-0.00981967	-0.00987404	-0.00954063	-0.00931	-0.0093859	-0.010001	-0.00981682	-0.0101942	-0.0101373	-0.0101387
1A00	-0.0123195	-0.0122434	-0.0112098	-0.0102538	-0.0101755	-0.00935716	-0.00928971	-0.00944716	-0.00910015	-0.00904038	-0.00979182	-0.0101079	-0.00965477	-0.00942907	-0.009216	-0.0094871	-0.00920861	-0.00938018	-0.00979764	-0.00979886
1AY46	-0.0123046	-0.0122704	-0.0113035	-0.0104876	-0.0103472	-0.00948453	-0.00965324	-0.00945629	-0.00915275	-0.0088247	-0.00952878	-0.00988602	-0.00917949	-0.00930355	-0.00939439	-0.00952161	-0.00938563	-0.0098461	-0.0100655	-0.00997798
2HHB	-0.0127814	-0.0129413	-0.0122994	-0.0116222	-0.0116696	-0.0108019	-0.0111898	-0.0105448	-0.0105575	-0.00970283	-0.0100123	-0.0103193	-0.0100457	-0.0098514	-0.00924064	-0.00938405	-0.00892794	-0.00863562	-0.00902223	-0.00913187
1A0U	-0.0126792	-0.0126929	-0.0118719	-0.0111732	-0.0111962	-0.0105683	-0.0107654	-0.0104159	-0.0102249	-0.00985688	-0.010346	-0.0101053	-0.00947173	-0.0096211	-0.0097801	-0.00988341	-0.00985148	-0.00956911	-0.00977724	-0.00977027
1A0Z	-0.0127134	-0.0127557	-0.0119211	-0.0111992	-0.011072	-0.010461	-0.0104015	-0.0104745	-0.0102922	-0.00961461	-0.00976713	-0.00972735	-0.00918202	-0.00915211	-0.00917081	-0.00923278	-0.00924081	-0.00941217	-0.00972587	-0.00972442
1C7D	-0.0125652	-0.0126817	-0.0125595	-0.012448	-0.013082	-0.0132019	-0.0142005	-0.0147225	-0.0149742	-0.0157545	-0.0149313	-0.0150238	-0.0153397	-0.0152916	-0.0149543	-0.0149569	-0.0144273	-0.0143692	-0.0146624	-0.0146268
1E7I	-0.0109291	-0.0106886	-0.00957721	-0.0090434	-0.00878415	-0.00788052	-0.00759096	-0.00754529	-0.00732284	-0.00704006	-0.007946	-0.00818847	-0.00753695	-0.0074789	-0.00747364	-0.00758838	-0.00753685	-0.00780155	-0.00817167	-0.00818832
1UOR	-0.0116515	-0.012239	-0.0123954	-0.0123395	-0.0125638	-0.0120417	-0.0125231	-0.0124076	-0.0123514	-0.0121138	-0.0123905	-0.0125195	-0.0124092	-0.0126715	-0.0125221	-0.0127517	-0.0123178	-0.0124241	-0.0124563	-0.012807
1E_78	-0.0114163	-0.0113138	-0.00993579	-0.00865131	-0.00852986	-0.008218	-0.00804816	-0.00778632	-0.00740697	-0.00661935	-0.00666293	-0.00692093	-0.00604957	-0.00659706	-0.00636007	-0.0070563	-0.00703289	-0.00729545	-0.00763891	-0.00763891
1AO6	-0.0114585	-0.0110126	-0.0101141	-0.00941531	-0.00956997	-0.00922892	-0.0096523	-0.00941858	-0.00922208	-0.00945616	-0.0106771	-0.0105618	-0.0101896	-0.0110313	-0.0115032	-0.010491	-0.0105971	-0.0108699	-0.0111196	-0.0111173
1BM0	-0.0114727	-0.0110162	-0.0101063	-0.00937393	-0.0097899	-0.00942719	-0.00964565	-0.00981453	-0.00959809	-0.00965259	-0.00920374	-0.00969497	-0.00983637	-0.00965517	-0.00953034	-0.00989958	-0.0100151	-0.00955948	-0.0101501	-0.0101501
1IGY	-0.0103392	-0.0103646	-0.010239	-0.00991461	-0.00986086	-0.00930297	-0.00931181	-0.00915545	-0.0089662	-0.00835519	-0.00874687	-0.00870612	-0.00834206	-0.00811139	-0.00791938	-0.00789035	-0.00773116	-0.00776926	-0.00772817	-0.00759075
1IGT	-0.0113788	-0.0117028	-0.0117555	-0.0114158	-0.0115381	-0.0109981	-0.0111116	-0.0108417	-0.0106323	-0.0102784	-0.010383	-0.0105222	-0.0104378	-0.0103294	-0.0100854	-0.0101387	-0.0100531	-0.010077	-0.00997014	-0.00999134
1HZH	-0.0113362	-0.0114636	-0.0112505	-0.0109035	-0.0111201	-0.010877	-0.0114913	-0.0115751	-0.0118325	-0.011908	-0.0120169	-0.0122663	-0.0126498	-0.0126638	-0.0124238	-0.0125891	-0.012429	-0.0126618	-0.012872	-0.0129614

## Sheet: AA_T_phi_ty
	AA_T_phi_ty_1.4A	AA_T_phi_ty_2A	AA_T_phi_ty_3A	AA_T_phi_ty_4A	AA_T_phi_ty_5A	AA_T_phi_ty_6A	AA_T_phi_ty_7A	AA_T_phi_ty_8A	AA_T_phi_ty_9A	AA_T_phi_ty_10A	AA_T_phi_ty_11A	AA_T_phi_ty_12A	AA_T_phi_ty_13A	AA_T_phi_ty_14A	AA_T_phi_ty_15A	AA_T_phi_ty_16A	AA_T_phi_ty_17A	AA_T_phi_ty_18A	AA_T_phi_ty_19A	AA_T_phi_ty_20A
	1.4	2	3	4	5	6	7	8	9	10	11	12	13	14	15	16	17	18	19	20
1A4V	41.1594	29.0245	18.5617	13.1241	10.0175	8.13965	6.96295	6.14577	5.44746	4.7663	4.63804	4.28295	3.98419	3.63911	3.37626	3.17892	2.90695	2.86836	2.75191	2.70069
1EXS	48.6496	34.0595	20.9474	14.4306	10.7791	8.47722	7.28826	6.29217	5.54545	4.83411	4.65259	4.14642	3.79487	3.5072	3.26003	3.09972	2.85844	2.70343	2.57724	2.48292
1BEB	94.922	68.2417	43.9948	31.1821	24.0833	19.3351	16.136	14.0215	12.567	10.8862	10.7099	9.77672	9.01177	8.4093	7.93165	7.42018	6.74212	6.44401	6.17273	5.94403
1LYZ	23.7218	15.082	8.60945	5.98888	4.43279	3.53134	2.89948	2.41337	2.18538	1.92689	1.8672	1.70742	1.5817	1.43164	1.33064	1.21416	1.16445	1.11028	1.05126	1.0107
135L	24.2261	15.2643	8.88532	6.13457	4.70794	3.71679	3.06358	2.637	2.42264	2.12701	2.0786	1.90197	1.70349	1.53243	1.39139	1.30929	1.23259	1.15394	1.11041	1.07803
2LYM	24.5721	15.8888	9.01888	6.2378	4.71986	3.70767	3.04252	2.50754	2.29088	2.00329	1.98348	1.8475	1.67502	1.51712	1.3733	1.28917	1.22406	1.13672	1.09139	1.0484
2LZT	24.1688	15.446	8.89704	6.20176	4.64917	3.57611	2.99554	2.56118	2.30164	1.98223	1.93844	1.7995	1.65	1.4989	1.40377	1.28961	1.19439	1.13085	1.06061	1.02112
1L35	35.6354	21.9557	12.3667	8.46183	6.31438	4.98481	4.12388	3.49701	3.15831	2.82949	2.81934	2.54898	2.32283	2.05974	1.946	1.84267	1.68429	1.61401	1.52395	1.44175
1LYD	35.6012	22.1604	12.6372	8.49578	6.48001	5.20724	4.35532	3.68414	3.22027	2.75168	2.76691	2.503	2.28366	2.06694	1.9584	1.7895	1.6711	1.60634	1.55358	1.49745
8RAT	24.4753	15.3468	9.08211	6.11319	4.4616	3.56679	2.98042	2.51488	2.19326	1.9886	1.92764	1.85887	1.65853	1.5066	1.38193	1.28777	1.18547	1.16018	1.08909	1.02366
1RBX	23.497	14.8315	8.79078	6.00058	4.63617	3.56927	3.00256	2.52075	2.17694	1.90343	1.86405	1.71904	1.58442	1.47017	1.32414	1.28018	1.13974	1.08954	1.03648	0.995193
3RN3	24.4003	15.6426	9.16396	6.37742	4.78773	3.81901	3.19223	2.6679	2.3416	2.03311	2.03563	1.91164	1.77917	1.66281	1.56632	1.4773	1.31743	1.23312	1.1618	1.13993
1AFU	61.8471	44.682	28.3839	19.276	14.6079	11.5921	9.6478	8.36523	7.35275	6.47497	6.43533	6.05104	5.57286	5.07999	4.88152	4.58917	4.09108	3.89382	3.70188	3.52493
1HHO	65.11	41.619	24.0939	16.4631	12.4322	9.79347	8.23965	7.06978	6.32104	5.39332	5.24592	4.88887	4.51023	4.08051	3.80639	3.58466	3.29941	3.1294	3.0004	2.88579
2HCO	67.519	42.7414	24.3062	16.4039	12.498	9.88834	8.23169	7.08505	6.22575	5.51719	5.29518	4.80768	4.4663	4.0861	3.85189	3.65238	3.36584	3.18448	3.03507	2.83762
2DHB	68.7314	43.3224	25.0223	17.1243	12.663	9.89764	8.37796	7.27829	6.36719	5.62638	5.42304	4.96255	4.59453	4.12132	3.81114	3.62488	3.31149	3.16275	3.04512	2.90374
1BUW	153.402	106.391	64.7067	43.7462	32.5805	25.7546	21.1932	17.9006	15.7225	13.3593	12.9131	11.8138	10.6014	9.64407	9.03574	8.57453	7.79186	7.28317	6.81674	6.55152
1Y4G	157.018	108.871	65.8123	43.6263	32.4198	25.3743	21.0303	17.7492	15.5199	13.5501	13.1317	11.7615	10.61	9.67119	8.93918	8.32485	7.684	7.26431	6.75522	6.47831
1Y4F	156.805	108.335	65.8017	43.4644	32.392	25.3622	20.9416	17.6807	15.5907	13.4315	12.8815	11.7379	10.6413	9.79904	9.19533	8.57201	7.83555	7.51044	6.94719	6.51774
1A01	152.844	106.453	65.4283	43.4198	32.131	25.5877	21.2238	17.9542	15.6775	13.4163	12.8251	11.7689	10.5814	9.65113	9.04977	8.53333	7.74211	7.31473	6.93683	6.55083
1Y4P	158.099	110.008	66.5826	43.9541	32.6293	25.6022	21.072	18.0827	15.7838	13.5466	13.0219	11.8144	10.6973	9.68827	9.01998	8.43896	7.55318	7.21771	6.76167	6.43446
1A00	152.895	106.575	64.658	43.6337	32.649	25.547	20.8721	17.7454	15.5634	13.3986	12.9586	11.8273	10.6623	9.74664	9.14762	8.63066	7.75742	7.40958	6.89002	6.54566
1AY46	156.42	108.623	65.7829	43.678	32.5057	25.598	21.0912	17.913	15.71	13.4822	12.9061	11.6504	10.5349	9.7432	9.0328	8.43868	7.69045	7.21562	6.70666	6.40467
2HHB	123.507	76.4162	43.7094	28.3498	20.4713	15.9097	13.0819	10.9086	9.37406	8.12128	7.70183	7.05191	6.50929	5.81575	5.44853	5.0557	4.53474	4.27881	4.00506	3.81554
1A0U	151.009	105.407	63.8856	43.0887	31.9022	25.2888	20.8501	17.565	15.5044	13.3224	13.0442	11.6809	10.529	9.54902	8.86446	8.43391	7.71339	7.25106	6.8033	6.52093
1A0Z	153.035	106.38	64.9784	43.315	32.4619	25.5263	20.9484	17.6888	15.7219	13.5515	13.1225	11.8438	10.7384	9.78836	9.08792	8.44349	7.73911	7.32634	6.85572	6.45702
1C7D	164.778	114.409	70.9645	48.5299	35.9132	28.1375	23.1215	19.208	16.7222	14.5946	14.0381	12.946	11.6734	10.6113	9.79725	9.23057	8.47776	8.10147	7.68134	7.30596
1E7I	180.324	121.482	70.8333	47.7375	35.2964	27.0905	22.5197	19.1851	16.4445	14.1562	13.4245	11.9333	10.8445	9.7733	8.87369	8.36991	7.72195	7.27035	6.85265	6.45786
1UOR	174.318	111.968	64.275	42.6313	31.1277	23.7732	19.4713	16.3116	13.8552	11.9203	11.3334	10.1082	9.02876	8.22591	7.51751	6.96166	6.32461	5.9616	5.56578	5.28627
1E_78	157.369	96.3975	51.5205	33.2308	23.8292	18.3992	15.1542	12.5887	10.6724	9.06829	8.62321	7.71115	7.03884	6.39986	5.76989	5.43176	4.94036	4.5864	4.25556	3.94777
1AO6	158.417	94.0451	49.727	32.0092	23.6169	18.2914	14.9439	12.4794	10.8426	9.24037	8.74716	7.62901	7.0405	6.28205	5.69851	5.36024	4.85202	4.56862	4.23292	3.9798
1BM0	156.847	93.0756	49.426	32.2696	23.3982	18.0858	14.9656	12.7213	10.9145	9.24438	8.65972	7.6459	6.99581	6.29247	5.8291	5.45664	4.90283	4.62565	4.34307	4.0949
1IGY	294.932	203.633	123.35	83.1972	61.9536	47.6904	39.1207	32.1735	26.927	22.6547	21.6127	19.4355	17.3075	15.3383	13.9395	12.8577	11.5466	10.8437	10.013	9.49509
1IGT	308.002	212.142	128.918	87.3798	65.1903	50.7025	41.3735	34.404	29.7393	25.2976	24.1964	21.897	19.6588	17.4924	16.1559	15.0408	13.5045	12.7527	11.8674	11.0429
1HZH	320.569	221.63	134.544	90.0879	66.9951	51.9148	42.1397	35.0067	29.9621	25.472	24.4015	21.6901	19.3287	17.275	15.7206	14.3627	12.9453	12.1389	11.6778	10.9679

## Sheet: AA_phi_A
	AA_phi_A_1.4A	AA_phi_A_2A	AA_phi_A_3A	AA_phi_A_4A	AA_phi_A_5A	AA_phi_A_6A	AA_phi_A_7A	AA_phi_A_8A	AA_phi_A_9A	AA_phi_A_10A	AA_phi_A_11A	AA_phi_A_12A	AA_phi_A_13A	AA_phi_A_14A	AA_phi_A_15A	AA_phi_A_16A	AA_phi_A_17A	AA_phi_A_18A	AA_phi_A_19A	AA_phi_A_20A
	1.4	2	3	4	5	6	7	8	9	10	11	12	13	14	15	16	17	18	19	20
1A4V	1511.59	1051.89	685.047	490.239	372.504	305.577	258.298	225.821	200.136	177.616	158.848	146.637	136.501	127.271	118.017	111.343	104.42	100.388	97.877	96.678
1EXS	1990.06	1357.62	834.993	576.399	427.832	341.76	287.987	242.746	209.542	185.193	165.301	145.718	134.155	125.588	116.067	108.935	101.146	95.349	92.621	88.994
1BEB	3840.58	2684.4	1736.67	1237.51	946.149	756.559	624.693	536.846	475.436	415.952	378.207	342.895	313.464	293.217	272.532	253.009	237.874	224.234	216.595	208.642
1LYZ	1235.31	775.146	461.306	324.488	242.69	197.625	164.706	139.391	122.186	108.998	97.8642	89.6771	83.6091	77.3701	72.6261	66.9261	64.296	60.966	57.657	55.258
135L	1222.98	752.738	452.739	319.711	247.817	200.829	167.538	144.017	128.016	113.426	101.583	91.5102	81.9571	75.0341	68.8111	64.993	60.919	56.638	54.505	52.823
2LYM	1275.01	802.476	476.374	344.815	261.126	209.184	174.302	147.643	131.848	114.087	103.441	96.6132	88.6752	81.6961	75.6791	71.8571	68.2651	63.7231	60.424	57.8249
2LZT	1250.47	774.516	460.135	332.493	251.378	197.569	167.944	146.132	128.205	112.87	101.968	92.5842	85.8152	80.2521	75.6401	70.6491	66.123	62.555	59.02	56.873
1L35	1628.63	988.582	570.792	396.345	294.811	233.615	190.129	163.342	144.374	129.393	116.539	105.775	96.8482	88.2702	82.4952	78.6942	74.3761	70.7911	67.012	62.101
1LYD	1621.51	993.811	579.938	396.222	301.901	242.516	200.622	173.782	150.715	131.003	119.832	107.348	97.4822	90.0252	84.7392	78.3332	74.461	70.869	67.59	65.456
8RAT	1330.55	817.781	489.976	340.778	252.041	197.692	165.488	140.922	121.265	111.401	99.9992	94.5832	86.1651	79.0131	71.8741	67.156	64	60.9	57.164	54.113
1RBX	1279.38	798.415	481.085	336.195	257.477	200.774	167.96	142.989	122.998	108.172	98.1292	89.2242	83.1841	77.4281	70.7421	67.16	62.372	59.275	55.538	53.19
3RN3	1325.47	829.608	497.316	348.906	261.914	209.114	173.341	145.184	127.044	112.353	103.315	96.2582	89.6792	82.7681	76.1001	71.7991	66.8111	61.85	58.539	56.88
1AFU	3428.38	2425.9	1576.06	1108.67	853.936	683.944	567.087	491.262	428.411	380.007	346.156	318.014	293.04	270.689	252.532	237.233	217.695	205.828	197.702	189.554
1HHO	2814.12	1762.98	1039.81	723.322	547.265	432.807	356.74	305.387	269.284	236.871	210.77	194.798	180.475	166.367	152.786	143.313	134.448	126.581	121.163	116.453
2HCO	2928.65	1815.73	1049.86	720.444	546.346	433.995	358.171	306.974	264.752	238.518	211.403	192.448	180.02	166.829	155.998	145.305	136.506	129.076	122.717	116.385
2DHB	2893.93	1785.82	1052.45	729.106	537.905	426.279	355.932	307.78	264.05	236.856	210.771	192.752	178.694	162.477	150.235	142.648	133.748	126.141	120.936	115.072
1BUW	6813.94	4638.34	2867.97	1984.5	1479.61	1176.1	962.673	812.626	704.891	614.29	549.085	494.525	446.172	410.83	383.663	359.793	335.482	313.01	292.472	283.016
1Y4G	6937.02	4748.71	2935.65	1999.63	1487.46	1176.71	961.057	810.93	701.069	621.523	556.973	500.387	454.767	419.554	383.845	358.429	340.098	320.044	300.376	288.768
1Y4F	6954.37	4749.96	2945.7	1997.66	1485.87	1178.41	957.532	810.924	705.076	621.833	553.644	499.664	455.584	422.654	394.482	367.846	345.899	328.336	304.724	288.926
1A01	6831.44	4688.74	2937.68	2004.28	1493.02	1188.61	978.046	823.139	711.969	620.132	548.038	499.748	455.151	418.102	390.572	366.907	341.064	321.352	303.536	288.022
1Y4P	6961.94	4776.92	2949.84	2001.61	1495.4	1180.17	960.136	817.313	706.93	621.815	556.863	500.808	456.302	416.674	387.164	361.127	336.304	319.112	298.321	287.031
1A00	6790.42	4676.97	2896.15	2003.46	1499.59	1179.43	961.361	816.041	708.356	623.712	555.466	502.673	460.52	424.878	394.789	369.518	344.087	324.255	305.153	292.127
1AY46	6900.58	4729.41	2928.99	1983.82	1486.2	1170.88	955.365	807.954	702.428	616.612	548.714	495.734	453.793	420.572	389.122	362.506	339.187	319.717	298.891	286.268
2HHB	5374.31	3248.46	1886.16	1234.47	887.085	686.403	557.567	465.037	393.183	347.38	305.01	277.478	257.619	232.41	216.111	200.024	184.569	171.955	162.07	153.861
1A0U	6712.27	4622.61	2863.82	1974.55	1471.83	1163.38	954.494	804.139	700.998	615.405	553.848	495.769	450.483	415.858	384.771	365.337	339.69	318.342	300.758	289.182
1A0Z	6794.62	4660.98	2903.15	1985.56	1495.3	1177.82	961.988	817.349	713.499	626.591	559.328	502.601	459.916	422.891	391.167	362.563	340.814	321.665	304.323	288.39
1C7D	7392.3	5089.36	3219.4	2260.05	1690.34	1336.87	1095.12	921.88	791.665	706.636	629.178	572.598	520.392	479.304	441.872	412.745	388.374	369.522	347.523	331.835
1E7I	7014.49	4606.36	2701.15	1834.8	1347.18	1039.62	849.031	707.642	597.706	520.919	459.977	410.33	369.131	336.635	307.005	287.229	266.918	248.125	235.638	222.188
1UOR	6733.87	4202.19	2447.09	1642.99	1204.5	923.5	744.67	614.132	519.445	453.01	398.007	354.219	316.461	290.277	264.062	243.011	225.931	211.441	199.698	189.836
1E_78	5971.49	3522.37	1879.93	1197.18	852.247	651.335	525.383	425.289	353.927	302.519	265.665	237.369	216.005	199.154	179.245	166.252	154.359	141.991	132.642	123.746
1AO6	5946.82	3398.8	1791.88	1149.51	834.773	638.739	506.01	414.962	352.426	304.735	266.493	233.18	212.49	190.622	172.022	159.961	148.254	137.364	128.661	121.186
1BM0	5899.77	3370.45	1791.88	1161.35	832.205	634.018	508.103	417.698	351.78	302.506	263.71	233.376	212.143	191.661	177.435	163.292	149.69	139.293	130.569	123.567
1IGY	15207.1	10194.5	6232.83	4283.57	3175.84	2457.97	1978.8	1631.9	1358.06	1162.06	1018.86	906.917	807.484	723.116	662.005	610.46	553.998	512.668	477.219	457.887
1IGT	15801.4	10563.7	6492.97	4461.34	3324.95	2586.38	2080.75	1717.61	1455.03	1256.6	1107.58	984.941	884.758	798.217	728.802	673.386	610.758	568.017	536.342	500.591
1HZH	16823.9	11443.1	7074.53	4829.35	3581.22	2784.74	2248.93	1877.4	1594.14	1379.45	1218.86	1081.02	962.868	873.396	800.792	737.087	674.246	620.93	602.09	566.459

## Sheet: AA_phi_ind
	AA_phi_ind_1.4A	AA_phi_ind_2A	AA_phi_ind_3A	AA_phi_ind_4A	AA_phi_ind_5A	AA_phi_ind_6A	AA_phi_ind_7A	AA_phi_ind_8A	AA_phi_ind_9A	AA_phi_ind_10A	AA_phi_ind_11A	AA_phi_ind_12A	AA_phi_ind_13A	AA_phi_ind_14A	AA_phi_ind_15A	AA_phi_ind_16A	AA_phi_ind_17A	AA_phi_ind_18A	AA_phi_ind_19A	AA_phi_ind_20A
	1.4	2	3	4	5	6	7	8	9	10	11	12	13	14	15	16	17	18	19	20
1A4V	0.0272291	0.0275926	0.0270956	0.0267708	0.0268924	0.026637	0.0269571	0.0272152	0.0272188	0.0268349	0.029198	0.0292079	0.029188	0.0285934	0.0286083	0.0285507	0.027839	0.0285728	0.0281161	0.0279349
1EXS	0.0244464	0.0250877	0.025087	0.0250358	0.0251948	0.0248046	0.0253076	0.0259208	0.0264646	0.0261031	0.0281461	0.0284551	0.0282872	0.0279263	0.0280875	0.0284548	0.0282606	0.028353	0.0278257	0.0278998
1BEB	0.0247155	0.0254215	0.0253329	0.0251974	0.025454	0.0255567	0.0258303	0.0261183	0.0264327	0.0261718	0.0283175	0.0285123	0.028749	0.0286795	0.0291036	0.0293278	0.0283433	0.0287379	0.028499	0.0284892
1LYZ	0.0192031	0.019457	0.0186632	0.0184564	0.0182653	0.0178689	0.017604	0.0173137	0.0178857	0.0176781	0.0190795	0.0190396	0.0189178	0.0185038	0.0183218	0.0181417	0.0181108	0.0182114	0.0182331	0.0182907
135L	0.0198091	0.0202784	0.0196257	0.0191879	0.0189976	0.0185073	0.0182859	0.0183104	0.0189245	0.0187523	0.020462	0.0207843	0.0207851	0.0204231	0.0202205	0.0201451	0.0202332	0.0203739	0.0203727	0.0204084
2LYM	0.0192721	0.0197997	0.0189323	0.0180903	0.018075	0.0177244	0.0174555	0.0169838	0.0173752	0.0175593	0.0191749	0.0191227	0.0188894	0.0185702	0.0181463	0.0179407	0.017931	0.0178385	0.0180623	0.0181305
2LZT	0.0193278	0.0199428	0.0193357	0.0186523	0.0184947	0.0181006	0.0178366	0.0175265	0.0179528	0.0175621	0.0190102	0.0194364	0.0192273	0.0186774	0.0185585	0.0182538	0.0180631	0.0180776	0.0179703	0.0179544
1L35	0.0218806	0.0222093	0.0216659	0.0213497	0.0214184	0.0213377	0.02169	0.0214092	0.0218759	0.0218674	0.0241922	0.0240981	0.0239843	0.0233345	0.0235893	0.0234156	0.0226456	0.0227996	0.0227414	0.0232162
1LYD	0.0219555	0.0222984	0.0217905	0.021442	0.021464	0.0214718	0.0217091	0.0211998	0.0213666	0.0210047	0.0230899	0.0233166	0.0234264	0.0229596	0.0231109	0.0228447	0.0224425	0.0226663	0.0229854	0.0228772
8RAT	0.0183949	0.0187664	0.0185358	0.0179389	0.0177019	0.0180422	0.0180099	0.0178459	0.0180865	0.0178508	0.0192766	0.0196533	0.0192482	0.0190677	0.0192271	0.0191757	0.018523	0.0190505	0.0190519	0.018917
1RBX	0.018366	0.0185761	0.0182728	0.0178485	0.0180061	0.0177776	0.0178766	0.017629	0.0176989	0.0175963	0.0189959	0.0192666	0.0190471	0.0189876	0.0187179	0.0190616	0.0182732	0.0183812	0.0186625	0.0187102
3RN3	0.0184088	0.0188554	0.0184268	0.0182783	0.0182798	0.0182628	0.0184158	0.018376	0.0184314	0.0180957	0.0197031	0.0198595	0.0198392	0.0200899	0.0205823	0.0205755	0.0197188	0.0199372	0.0198465	0.020041
1AFU	0.0180397	0.0184188	0.0180094	0.0173866	0.0171065	0.0169489	0.0170129	0.0170281	0.0171628	0.0170391	0.0185909	0.0190276	0.0190174	0.0187669	0.0193303	0.0193446	0.0187927	0.0189178	0.0187246	0.0185959
1HHO	0.0231369	0.0236072	0.0231714	0.0227604	0.0227169	0.0226278	0.0230971	0.0231503	0.0234735	0.022769	0.0248893	0.0250971	0.0249909	0.0245271	0.0249131	0.0250129	0.0245404	0.0247224	0.0247633	0.0247808
2HCO	0.0230547	0.0235395	0.023152	0.0227692	0.0228757	0.0227845	0.0229825	0.0230803	0.0235154	0.0231311	0.0250478	0.0249817	0.02481	0.0244927	0.024692	0.025136	0.024657	0.0246713	0.0247323	0.0243813
2DHB	0.0237502	0.0242591	0.0237754	0.0234868	0.0235412	0.0232187	0.0235381	0.0236477	0.0241136	0.0237544	0.0257295	0.0257458	0.0257117	0.0253655	0.0253679	0.0254114	0.0247591	0.0250731	0.0251796	0.0252341
1BUW	0.0225129	0.0229374	0.0225618	0.0220439	0.0220196	0.0218984	0.022015	0.0220281	0.0223048	0.0217476	0.0235176	0.0238892	0.0237607	0.0234746	0.0235512	0.0238318	0.0232259	0.0232682	0.0233073	0.023149
1Y4G	0.0226348	0.0229265	0.0224183	0.0218171	0.0217954	0.0215637	0.0218825	0.0218875	0.0221375	0.0218014	0.0235769	0.0235047	0.0233306	0.0230511	0.0232885	0.023226	0.0225935	0.0226978	0.0224892	0.0224343
1Y4F	0.0225477	0.0228075	0.0223382	0.0217577	0.0218001	0.0215224	0.0218704	0.0218031	0.0221121	0.0215999	0.0232668	0.0234916	0.0233575	0.0231845	0.0233099	0.0233033	0.0226527	0.0228742	0.0227983	0.0225585
1A01	0.0223737	0.0227039	0.0222721	0.0216636	0.0215208	0.0215274	0.0217002	0.0218119	0.0220199	0.0216347	0.0234018	0.0235496	0.0232482	0.0230832	0.0231706	0.0232575	0.0226999	0.0227624	0.0228534	0.0227442
1Y4P	0.0227091	0.023029	0.0225716	0.0219594	0.0218198	0.0216935	0.0219469	0.0221246	0.0223273	0.0217856	0.0233843	0.0235907	0.0234435	0.0232515	0.0232976	0.0233684	0.0224594	0.0226181	0.0226658	0.0224173
1A00	0.0225163	0.0227871	0.0223255	0.0217792	0.021772	0.0216606	0.021711	0.0217458	0.0219711	0.021482	0.0233292	0.0235287	0.0231527	0.0229399	0.0231709	0.0233565	0.022545	0.0228511	0.0225789	0.0224069
1AY46	0.0226677	0.0229675	0.0224592	0.0220171	0.0218717	0.0218623	0.0220766	0.0221709	0.0223653	0.0218649	0.0235207	0.0235013	0.0232151	0.0231665	0.0232133	0.0232788	0.0226732	0.0225688	0.0224385	0.022373
2HHB	0.022981	0.0235238	0.0231738	0.0229651	0.023077	0.0231784	0.0234624	0.0234575	0.0238415	0.0233787	0.0252511	0.0254143	0.0252671	0.0250237	0.0252118	0.0252754	0.0245693	0.0248833	0.0247119	0.0247986
1A0U	0.0224975	0.0228025	0.0223079	0.021822	0.0216753	0.0217373	0.0218441	0.0218432	0.0221176	0.0216481	0.0235519	0.0235612	0.0233727	0.0229622	0.0230383	0.0230853	0.0227071	0.0227776	0.0226205	0.0225496
1A0Z	0.0225229	0.0228235	0.022382	0.021815	0.0217093	0.0216726	0.0217761	0.0216417	0.0220349	0.0216273	0.0234612	0.0235651	0.0233485	0.0231463	0.0232328	0.0232883	0.0227077	0.0227763	0.0225278	0.0223899
1C7D	0.0222905	0.0224801	0.0220428	0.0214729	0.0212461	0.0210473	0.0211133	0.0208357	0.0211228	0.0206537	0.0223118	0.0226093	0.0224319	0.0221389	0.0221722	0.0223639	0.0218289	0.0219242	0.0221031	0.0220168
1E7I	0.0257073	0.0263727	0.0262234	0.0260179	0.0262002	0.0260581	0.0265241	0.0271113	0.0275127	0.0271753	0.0291851	0.0290821	0.0293784	0.0290324	0.0289041	0.0291402	0.02893	0.0293011	0.0290812	0.0290649
1UOR	0.0258867	0.0266452	0.0262659	0.0259473	0.0258428	0.0257424	0.0261476	0.0265604	0.0266731	0.0263135	0.0284755	0.0285366	0.0285304	0.0283381	0.0284688	0.0286475	0.0279936	0.0281951	0.027871	0.0278465
1E_78	0.0263533	0.0273672	0.0274056	0.0277575	0.0279605	0.0282485	0.0288441	0.0296005	0.0301543	0.029976	0.0324589	0.032486	0.0325865	0.0321352	0.0321899	0.0326717	0.0320056	0.0323006	0.032083	0.0319022
1AO6	0.026639	0.0276701	0.0277513	0.027846	0.0282915	0.0286368	0.0295329	0.0300737	0.0307655	0.0303226	0.0328233	0.0327173	0.0331333	0.0329556	0.0331267	0.0335098	0.0327277	0.0332591	0.0328997	0.0328405
1BM0	0.0265853	0.0276152	0.0275834	0.0277863	0.0281158	0.0285256	0.0294538	0.0304557	0.0310264	0.0305593	0.0328381	0.0327621	0.0329768	0.0328313	0.0328519	0.0334166	0.0327532	0.033208	0.0332625	0.0331391
1IGY	0.0193943	0.0199747	0.0197904	0.0194224	0.0195078	0.0194023	0.0197699	0.0197153	0.0198276	0.0194953	0.0212127	0.0214303	0.0214339	0.0212113	0.0210564	0.0210623	0.0208423	0.0211516	0.020982	0.0207367
1IGT	0.0194921	0.0200821	0.0198551	0.019586	0.0196064	0.0196037	0.0198839	0.0200302	0.0204389	0.0201318	0.0218462	0.0222318	0.0222195	0.0219143	0.0221678	0.022336	0.0221111	0.0224513	0.0221265	0.0220596
1HZH	0.0190544	0.019368	0.0190181	0.0186542	0.0187073	0.0186426	0.0187377	0.0186464	0.0187952	0.0184654	0.0200199	0.0200645	0.0200741	0.0197792	0.0196313	0.0194857	0.0191996	0.0195496	0.0193954	0.0193622

[truncated: 43 more sheets: AA_phi_pat, AA_T_phi_den, AA_S_phi_den, AA_T_amphi_ty, AA_amphi_den, AA_R_phophi_ty,  AA_R_phoamp_ty , AA_R_phophi_A, Chg_T_pos, Chg_pos_A, Chg_T_pos_den , Chg_S_pos_den, Chg_T_neg, Chg_neg_A, Chg_T_neg_den , Chg_S_neg_den, Chg_T, Chg_T_den ,  Chg_R_posneg , Chg_R_pos_tchg  …]
