# Supplementary material for: Protein Molecular Surface Mapped at Different Geometrical Resolutions
Source: PLoS One. 2013 Mar 14;8(3):e58896. doi: 10.1371/journal.pone.0058896 (PMC3597524; doi:10.1371/journal.pone.0058896)
Supplement: File S2 — (XLSX) [file pone.0058896.s002.xlsx]

## Sheet: Readme
General information
This file presents the full results for the Hemoglobin subset
Each sheet presents the results of probing protein molecular surface with probe radii from 1.4 A to 20 A
There are two sets of worksheets, the first organised by property measured, the second organised by probing radii
The sheets containing information organised by property (set 1) also contains two charts, for comparison: one (smaller) with the data presented in the manuscript; and one with all data (35 proteins)
A. Worsheets containing values organised along molecular surface-derived properties
The sheet name contains 3 fields
1st field
	AA	means Amino Acid-based property, i.e., hydrophobicity, hydrophilicity and amphiphilicity
	Chg	means Charge-based data
2nd field
	T	means Total
	R	means Ratio
	S	means Specific
	pho	means Hydrophobicity
	phi	means Hydrophilicity
	amphi	means Amphiphilicity
3rd field
	ty	refers to the actual property
	A	refers to the respective area
B. Worsheets containing values organised along probing radii
The sheet name contain 1 field: AA_number, [number] = radius of the probe

## Sheet: AA_T_pho_ty
	AA_T_pho_ty_1.4A	AA_T_pho_ty_2A	AA_T_pho_ty_3A	AA_T_pho_ty_4A	AA_T_pho_ty_5A	AA_T_pho_ty_6A	AA_T_pho_ty_7A	AA_T_pho_ty_8A	AA_T_pho_ty_9A	AA_T_pho_ty_10A	AA_T_pho_ty_11A	AA_T_pho_ty_12A	AA_T_pho_ty_13A	AA_T_pho_ty_14A	AA_T_pho_ty_15A	AA_T_pho_ty_16A	AA_T_pho_ty_17A	AA_T_pho_ty_18A	AA_T_pho_ty_19A	AA_T_pho_ty_20A
	1.4	2	3	4	5	6	7	8	9	10	11	12	13	14	15	16	17	18	19	20
1Y4G	-20.4554	-10.1063	-3.46189	-1.68669	-1.04351	-0.605574	-0.498831	-0.407998	-0.313689	-0.260877	-0.25289	-0.22323	-0.199805	-0.180449	-0.166765	-0.155398	-0.125703	-0.123443	-0.121008	-0.115445
1Y4F	-20.7597	-10.2834	-3.56887	-1.68776	-1.02956	-0.65205	-0.507199	-0.407667	-0.337746	-0.283978	-0.26904	-0.241572	-0.201616	-0.181858	-0.170268	-0.15314	-0.138515	-0.126941	-0.118327	-0.114634
1A01	-19.6655	-9.58841	-3.37472	-1.67244	-1.02457	-0.651841	-0.489548	-0.379268	-0.294581	-0.250654	-0.247183	-0.229623	-0.202039	-0.191951	-0.16952	-0.150625	-0.137194	-0.13054	-0.128601	-0.126744
1Y4P	-20.3328	-10.107	-3.4628	-1.67374	-0.995416	-0.62036	-0.502414	-0.382282	-0.311488	-0.25236	-0.252218	-0.224901	-0.194476	-0.180344	-0.170439	-0.150246	-0.133253	-0.1312	-0.120685	-0.111272
1A00	-20.0317	-9.93588	-3.49957	-1.78849	-1.1075	-0.708224	-0.524126	-0.431745	-0.336924	-0.287747	-0.266632	-0.247825	-0.20834	-0.183122	-0.165492	-0.156338	-0.140625	-0.138752	-0.135188	-0.126141
1Y46	-20.6983	-10.4489	-3.69728	-1.77716	-1.11478	-0.71003	-0.539819	-0.431888	-0.339311	-0.275569	-0.242498	-0.229732	-0.178036	-0.164636	-0.145951	-0.143148	-0.134374	-0.126739	-0.122125	-0.107054
1A0U	-21.172	-10.515	-3.76338	-1.96024	-1.20644	-0.792063	-0.614618	-0.470445	-0.41559	-0.318417	-0.296299	-0.24769	-0.208889	-0.191296	-0.177695	-0.169866	-0.159919	-0.134704	-0.132648	-0.12335
1A0Z	-20.7	-10.4764	-3.75822	-1.9341	-1.19663	-0.788394	-0.584401	-0.476162	-0.40569	-0.298284	-0.262902	-0.226414	-0.191105	-0.166367	-0.149126	-0.140911	-0.129963	-0.125587	-0.127166	-0.117957

## Sheet: AA_pho_A
	AA_pho_A_1.4A	AA_pho_A_2A	AA_pho_A_3A	AA_pho_A_4A	AA_pho_A_5A	AA_pho_A_6A	AA_pho_A_7A	AA_pho_A_8A	AA_pho_A_9A	AA_pho_A_10A	AA_pho_A_11A	AA_pho_A_12A	AA_pho_A_13A	AA_pho_A_14A	AA_pho_A_15A	AA_pho_A_16A	AA_pho_A_17A	AA_pho_A_18A	AA_pho_A_19A	AA_pho_A_20A
	1.4	2	3	4	5	6	7	8	9	10	11	12	13	14	15	16	17	18	19	20
1Y4G	1647.7	816.087	301.478	155.997	97.3519	61.79	50.434	41.407	33.343	28.685	25.975	22.338	21.108	18.699	17.23	15.98	13.155	12.43	11.936	11.209
1Y4F	1665.62	826.761	309.846	157.477	97.2729	66.143	49.889	41.863	34.483	30.821	27.154	24.195	21.078	18.923	17.237	15.263	14.31	12.89	11.922	11.441
1A01	1585.24	775.981	299.07	159.582	98.5759	67.969	50.799	40.088	31.705	27.985	25.303	23.338	21.582	20.605	17.997	16.064	15.126	13.709	12.973	12.731
1Y4P	1633	812.794	301.043	153.676	93.0599	63.265	49.968	39.243	32.576	27.434	25.685	22.777	20.384	19.371	18.159	15.023	13.574	12.87	11.905	10.975
1A00	1626.01	811.527	312.188	174.423	108.84	75.6879	56.42	45.701	37.024	31.829	27.23	24.518	21.579	19.421	17.957	16.479	15.271	14.792	13.798	12.873
1Y46	1682.16	851.552	327.092	169.454	107.738	74.8619	55.921	45.672	37.072	31.227	25.449	23.238	19.395	17.696	15.536	15.034	14.317	12.872	12.133	10.729
1A0U	1669.82	828.413	316.999	175.442	107.754	74.9469	57.0921	45.166	40.645	32.304	28.639	24.511	22.054	19.883	18.169	17.187	16.233	14.077	13.567	12.625
1A0Z	1628.2	821.317	315.257	172.7	108.077	75.3649	56.184	45.459	39.417	31.024	26.917	23.276	20.813	18.178	16.261	15.262	14.064	13.343	13.075	12.13

## Sheet: AA_pho_ind
	AA_pho_ind_1.4A	AA_pho_ind_2A	AA_pho_ind_3A	AA_pho_ind_4A	AA_pho_ind_5A	AA_pho_ind_6A	AA_pho_ind_7A	AA_pho_ind_8A	AA_pho_ind_9A	AA_pho_ind_10A	AA_pho_ind_11A	AA_pho_ind_12A	AA_pho_ind_13A	AA_pho_ind_14A	AA_pho_ind_15A	AA_pho_ind_16A	AA_pho_ind_17A	AA_pho_ind_18A	AA_pho_ind_19A	AA_pho_ind_20A
	1.4	2	3	4	5	6	7	8	9	10	11	12	13	14	15	16	17	18	19	20
1Y4G	-0.0124145	-0.0123839	-0.0114831	-0.0108123	-0.010719	-0.00980052	-0.00989077	-0.00985336	-0.00940794	-0.00909453	-0.0097359	-0.00999327	-0.00946584	-0.00965018	-0.00967873	-0.00972454	-0.00955552	-0.00993106	-0.0101381	-0.0102993
1Y4F	-0.0124637	-0.0124382	-0.0115182	-0.0107175	-0.0105843	-0.0098582	-0.0101665	-0.00973811	-0.00979456	-0.00921378	-0.00990794	-0.00998438	-0.00956525	-0.00961041	-0.00987808	-0.0100334	-0.00967957	-0.00984804	-0.00992508	-0.0100196
1A01	-0.0124054	-0.0123565	-0.011284	-0.0104801	-0.0103938	-0.00959027	-0.00963695	-0.00946087	-0.00929131	-0.00895673	-0.00976891	-0.00983903	-0.00936146	-0.00931576	-0.00941936	-0.00937654	-0.00907011	-0.00952221	-0.009913	-0.00995555
1Y4P	-0.0124512	-0.0124349	-0.0115027	-0.0108913	-0.0106965	-0.00980575	-0.0100547	-0.00974139	-0.00956188	-0.00919881	-0.00981967	-0.00987404	-0.00954063	-0.00931	-0.0093859	-0.010001	-0.00981682	-0.0101942	-0.0101373	-0.0101387
1A00	-0.0123196	-0.0122434	-0.0112098	-0.0102538	-0.0101755	-0.00935716	-0.00928971	-0.00944716	-0.00910015	-0.00904038	-0.00979182	-0.0101079	-0.00965477	-0.00942907	-0.009216	-0.00948711	-0.00920861	-0.00938018	-0.00979765	-0.00979886
1Y46	-0.0123046	-0.0122704	-0.0113035	-0.0104876	-0.0103472	-0.00948453	-0.00965325	-0.00945629	-0.00915275	-0.0088247	-0.00952878	-0.00988602	-0.00917949	-0.00930355	-0.00939439	-0.00952161	-0.00938563	-0.0098461	-0.0100655	-0.00997798
1A0U	-0.0126792	-0.0126929	-0.0118719	-0.0111732	-0.0111962	-0.0105683	-0.0107654	-0.0104159	-0.0102249	-0.00985688	-0.010346	-0.0101053	-0.00947173	-0.0096211	-0.0097801	-0.00988341	-0.00985148	-0.0095691	-0.00977724	-0.00977027
1A0Z	-0.0127134	-0.0127557	-0.0119211	-0.0111992	-0.011072	-0.010461	-0.0104015	-0.0104745	-0.0102922	-0.00961461	-0.00976713	-0.00972734	-0.00918202	-0.00915211	-0.00917081	-0.00923278	-0.00924081	-0.00941217	-0.00972587	-0.00972442

## Sheet: AA_pho_pat
	AA_pho_pat_1.4A	AA_pho_pat_2A	AA_pho_pat_3A	AA_pho_pat_4A	AA_pho_pat_5A	AA_pho_pat_6A	AA_pho_pat_7A	AA_pho_pat_8A	AA_pho_pat_9A	AA_pho_pat_10A	AA_pho_pat_11A	AA_pho_pat_12A	AA_pho_pat_13A	AA_pho_pat_14A	AA_pho_pat_15A	AA_pho_pat_16A	AA_pho_pat_17A	AA_pho_pat_18A	AA_pho_pat_19A	AA_pho_pat_20A
	1.4	2	3	4	5	6	7	8	9	10	11	12	13	14	15	16	17	18	19	20
1Y4G	-0.00325982	-0.0031841	-0.0028994	-0.00269439	-0.0026418	-0.00239357	-0.00239823	-0.00237208	-0.00225675	-0.00217397	-0.00232009	-0.00237478	-0.002245	-0.00228416	-0.00228444	-0.00228527	-0.00224469	-0.00232912	-0.00237271	-0.0024051
1Y4F	-0.00327234	-0.00319858	-0.00290625	-0.00267051	-0.00260649	-0.00240609	-0.00246213	-0.00234291	-0.00234546	-0.00220138	-0.00236	-0.00236836	-0.00226535	-0.00227322	-0.00233244	-0.002356	-0.00227073	-0.00230802	-0.00232013	-0.00233947
1A01	-0.00325858	-0.00317918	-0.00284786	-0.00261318	-0.00256143	-0.00234475	-0.00234233	-0.00228475	-0.00223167	-0.00214234	-0.00233191	-0.0023431	-0.00222021	-0.00220633	-0.00223053	-0.00221507	-0.00214366	-0.00225069	-0.00233821	-0.00234711
1Y4P	-0.00326842	-0.0031974	-0.0029026	-0.0027127	-0.00263338	-0.00239521	-0.0024389	-0.00234529	-0.00229035	-0.00219444	-0.00233535	-0.00234272	-0.00226135	-0.00219932	-0.00221349	-0.00234759	-0.00229747	-0.00238545	-0.00236637	-0.00236749
1A00	-0.00323562	-0.00314925	-0.00282908	-0.00255865	-0.00251133	-0.00229199	-0.00225916	-0.00228436	-0.00218782	-0.00216351	-0.00233887	-0.00240606	-0.00228945	-0.00223319	-0.00217752	-0.0022334	-0.00216346	-0.00220241	-0.00229132	-0.00229347
1Y46	-0.00322806	-0.00315486	-0.00285064	-0.00260963	-0.00254516	-0.0023128	-0.00233688	-0.0022731	-0.0021891	-0.00210358	-0.00226634	-0.0023442	-0.00217117	-0.00219514	-0.00221138	-0.00223669	-0.00220285	-0.00230435	-0.00234856	-0.00232726
1A0U	-0.00333103	-0.00326654	-0.00299632	-0.00278443	-0.00276073	-0.00258844	-0.0026154	-0.00251575	-0.00245911	-0.00235864	-0.00246916	-0.00240476	-0.00224612	-0.00227734	-0.00230772	-0.00232693	-0.00231767	-0.00224507	-0.00228703	-0.00228425
1A0Z	-0.00333816	-0.00327901	-0.00300899	-0.00279494	-0.00273203	-0.00255972	-0.00252987	-0.00253278	-0.00247372	-0.00229449	-0.00232657	-0.00231034	-0.00217165	-0.00216061	-0.00216125	-0.00216786	-0.00216605	-0.00220327	-0.00227082	-0.00226841

## Sheet: AA_T_pho_den
	AA_T_pho_den_1.4A	AA_T_pho_den_2A	AA_T_pho_den_3A	AA_T_pho_den_4A	AA_T_pho_den_5A	AA_T_pho_den_6A	AA_T_pho_den_7A	AA_T_pho_den_8A	AA_T_pho_den_9A	AA_T_pho_den_10A	AA_T_pho_den_11A	AA_T_pho_den_12A	AA_T_pho_den_13A	AA_T_pho_den_14A	AA_T_pho_den_15A	AA_T_pho_den_16A	AA_T_pho_den_17A	AA_T_pho_den_18A	AA_T_pho_den_19A	AA_T_pho_den_20A
	1.4	2	3	4	5	6	7	8	9	10	11	12	13	14	15	16	17	18	19	20
1Y4G	-0.00238281	-0.00181616	-0.00106944	-0.000782457	-0.000658445	-0.000488956	-0.000493165	-0.000478682	-0.00042713	-0.00040122	-0.000433813	-0.00042705	-0.000419868	-0.000411746	-0.000415794	-0.000415049	-0.000355844	-0.000371286	-0.000387459	-0.000384846
1Y4F	-0.00240837	-0.00184403	-0.00109625	-0.000783136	-0.00065033	-0.000523923	-0.000503463	-0.00047804	-0.000456686	-0.000435113	-0.000463225	-0.00046114	-0.000422976	-0.000411836	-0.000413555	-0.00039973	-0.000384539	-0.000372015	-0.000373689	-0.000381646
1A01	-0.00233651	-0.00175466	-0.00104263	-0.000772895	-0.000643739	-0.000518741	-0.000475822	-0.00043936	-0.000396115	-0.000386743	-0.000431127	-0.000438978	-0.000423799	-0.000437538	-0.000414912	-0.000393306	-0.000385172	-0.0003896	-0.000406313	-0.000421423
1Y4P	-0.00236572	-0.00180818	-0.00106519	-0.000776574	-0.000626655	-0.000498906	-0.000497389	-0.000446301	-0.000421211	-0.000388696	-0.000432957	-0.00042954	-0.000407976	-0.000413591	-0.000420501	-0.00039943	-0.000380857	-0.000395202	-0.000389024	-0.000373388
1A00	-0.00238009	-0.00181037	-0.00109078	-0.000821209	-0.000688559	-0.000564269	-0.000514969	-0.000501014	-0.000452017	-0.000438946	-0.000457583	-0.000470085	-0.000432152	-0.00041216	-0.000400952	-0.000405024	-0.000391322	-0.00040924	-0.000423852	-0.000413576
1Y46	-0.00241166	-0.00187228	-0.0011355	-0.000825329	-0.000699388	-0.000569968	-0.000533796	-0.000505945	-0.000458839	-0.000425366	-0.00042235	-0.000442667	-0.000376248	-0.00037565	-0.000360678	-0.000379159	-0.00038012	-0.000381068	-0.000392654	-0.000360454
1A0U	-0.00252587	-0.00192907	-0.00118316	-0.000911746	-0.00076377	-0.000639621	-0.000607578	-0.000553917	-0.000560364	-0.000491605	-0.000508681	-0.000476071	-0.000442059	-0.000439014	-0.000440995	-0.000444066	-0.000449308	-0.000405225	-0.000422007	-0.000408704
1A0Z	-0.00245761	-0.00191103	-0.00116773	-0.000896141	-0.00074632	-0.000629113	-0.000573971	-0.000551874	-0.000538825	-0.000453584	-0.000448451	-0.000430545	-0.000397532	-0.00037719	-0.000366019	-0.000372952	-0.000366218	-0.000374876	-0.000400651	-0.00039251

## Sheet: AA_S_pho_den
	AA_S_pho_den_1.4A	AA_S_pho_den_2A	AA_S_pho_den_3A	AA_S_pho_den_4A	AA_S_pho_den_5A	AA_S_pho_den_6A	AA_S_pho_den_7A	AA_S_pho_den_8A	AA_S_pho_den_9A	AA_S_pho_den_10A	AA_S_pho_den_11A	AA_S_pho_den_12A	AA_S_pho_den_13A	AA_S_pho_den_14A	AA_S_pho_den_15A	AA_S_pho_den_16A	AA_S_pho_den_17A	AA_S_pho_den_18A	AA_S_pho_den_19A	AA_S_pho_den_20A
	1.4	2	3	4	5	6	7	8	9	10	11	12	13	14	15	16	17	18	19	20
1Y4G	-0.0124145	-0.0123839	-0.0114831	-0.0108123	-0.010719	-0.00980052	-0.00989077	-0.00985336	-0.00940794	-0.00909453	-0.0097359	-0.00999327	-0.00946584	-0.00965018	-0.00967873	-0.00972454	-0.00955552	-0.00993106	-0.0101381	-0.0102993
1Y4F	-0.0124637	-0.0124382	-0.0115182	-0.0107175	-0.0105843	-0.0098582	-0.0101665	-0.00973811	-0.00979456	-0.00921378	-0.00990794	-0.00998438	-0.00956525	-0.00961041	-0.00987808	-0.0100334	-0.00967957	-0.00984804	-0.00992509	-0.0100196
1A01	-0.0124054	-0.0123565	-0.011284	-0.0104801	-0.0103938	-0.00959027	-0.00963695	-0.00946087	-0.00929131	-0.00895673	-0.00976891	-0.00983903	-0.00936146	-0.00931576	-0.00941936	-0.00937654	-0.00907011	-0.0095222	-0.009913	-0.00995555
1Y4P	-0.0124512	-0.0124349	-0.0115027	-0.0108913	-0.0106965	-0.00980575	-0.0100547	-0.00974139	-0.00956188	-0.00919881	-0.00981967	-0.00987404	-0.00954063	-0.00931	-0.0093859	-0.010001	-0.00981682	-0.0101942	-0.0101373	-0.0101387
1A00	-0.0123195	-0.0122434	-0.0112098	-0.0102538	-0.0101755	-0.00935716	-0.00928971	-0.00944716	-0.00910015	-0.00904038	-0.00979182	-0.0101079	-0.00965477	-0.00942907	-0.009216	-0.0094871	-0.00920861	-0.00938018	-0.00979764	-0.00979886
1Y46	-0.0123046	-0.0122704	-0.0113035	-0.0104876	-0.0103472	-0.00948453	-0.00965324	-0.00945629	-0.00915275	-0.0088247	-0.00952878	-0.00988602	-0.00917949	-0.00930355	-0.00939439	-0.00952161	-0.00938563	-0.0098461	-0.0100655	-0.00997798
1A0U	-0.0126792	-0.0126929	-0.0118719	-0.0111732	-0.0111962	-0.0105683	-0.0107654	-0.0104159	-0.0102249	-0.00985688	-0.010346	-0.0101053	-0.00947173	-0.0096211	-0.0097801	-0.00988341	-0.00985148	-0.00956911	-0.00977724	-0.00977027
1A0Z	-0.0127134	-0.0127557	-0.0119211	-0.0111992	-0.011072	-0.010461	-0.0104015	-0.0104745	-0.0102922	-0.00961461	-0.00976713	-0.00972735	-0.00918202	-0.00915211	-0.00917081	-0.00923278	-0.00924081	-0.00941217	-0.00972587	-0.00972442

## Sheet: AA_T_phi_ty
	AA_T_phi_ty_1.4A	AA_T_phi_ty_2A	AA_T_phi_ty_3A	AA_T_phi_ty_4A	AA_T_phi_ty_5A	AA_T_phi_ty_6A	AA_T_phi_ty_7A	AA_T_phi_ty_8A	AA_T_phi_ty_9A	AA_T_phi_ty_10A	AA_T_phi_ty_11A	AA_T_phi_ty_12A	AA_T_phi_ty_13A	AA_T_phi_ty_14A	AA_T_phi_ty_15A	AA_T_phi_ty_16A	AA_T_phi_ty_17A	AA_T_phi_ty_18A	AA_T_phi_ty_19A	AA_T_phi_ty_20A
	1.4	2	3	4	5	6	7	8	9	10	11	12	13	14	15	16	17	18	19	20
1Y4G	157.018	108.871	65.8123	43.6263	32.4198	25.3743	21.0303	17.7492	15.5199	13.5501	13.1317	11.7615	10.61	9.67119	8.93918	8.32485	7.684	7.26431	6.75522	6.47831
1Y4F	156.805	108.335	65.8017	43.4644	32.392	25.3622	20.9416	17.6807	15.5907	13.4315	12.8815	11.7379	10.6413	9.79904	9.19533	8.57201	7.83555	7.51044	6.94719	6.51774
1A01	152.844	106.453	65.4283	43.4198	32.131	25.5877	21.2238	17.9542	15.6775	13.4163	12.8251	11.7689	10.5814	9.65113	9.04977	8.53333	7.74211	7.31473	6.93683	6.55083
1Y4P	158.099	110.008	66.5826	43.9541	32.6293	25.6022	21.072	18.0827	15.7838	13.5466	13.0219	11.8144	10.6973	9.68827	9.01998	8.43896	7.55318	7.21771	6.76167	6.43446
1A00	152.895	106.575	64.658	43.6337	32.649	25.547	20.8721	17.7454	15.5634	13.3986	12.9586	11.8273	10.6623	9.74664	9.14762	8.63066	7.75742	7.40958	6.89002	6.54566
1Y46	156.42	108.623	65.7829	43.678	32.5057	25.598	21.0912	17.913	15.71	13.4822	12.9061	11.6504	10.5349	9.7432	9.0328	8.43868	7.69045	7.21562	6.70666	6.40467
1A0U	151.009	105.407	63.8856	43.0887	31.9022	25.2888	20.8501	17.565	15.5044	13.3224	13.0442	11.6809	10.529	9.54902	8.86446	8.43391	7.71339	7.25106	6.8033	6.52093
1A0Z	153.035	106.38	64.9784	43.315	32.4619	25.5263	20.9484	17.6888	15.7219	13.5515	13.1225	11.8438	10.7384	9.78836	9.08792	8.44349	7.73911	7.32634	6.85572	6.45702

## Sheet: AA_phi_A
	AA_phi_A_1.4A	AA_phi_A_2A	AA_phi_A_3A	AA_phi_A_4A	AA_phi_A_5A	AA_phi_A_6A	AA_phi_A_7A	AA_phi_A_8A	AA_phi_A_9A	AA_phi_A_10A	AA_phi_A_11A	AA_phi_A_12A	AA_phi_A_13A	AA_phi_A_14A	AA_phi_A_15A	AA_phi_A_16A	AA_phi_A_17A	AA_phi_A_18A	AA_phi_A_19A	AA_phi_A_20A
	1.4	2	3	4	5	6	7	8	9	10	11	12	13	14	15	16	17	18	19	20
1Y4G	6937.02	4748.71	2935.65	1999.63	1487.46	1176.71	961.057	810.93	701.069	621.523	556.973	500.387	454.767	419.554	383.845	358.429	340.098	320.044	300.376	288.768
1Y4F	6954.37	4749.96	2945.7	1997.66	1485.87	1178.41	957.532	810.924	705.076	621.833	553.644	499.664	455.584	422.654	394.482	367.846	345.899	328.336	304.724	288.926
1A01	6831.44	4688.74	2937.68	2004.28	1493.02	1188.61	978.046	823.139	711.969	620.132	548.038	499.748	455.151	418.102	390.572	366.907	341.064	321.352	303.536	288.022
1Y4P	6961.94	4776.92	2949.84	2001.61	1495.4	1180.17	960.136	817.313	706.93	621.815	556.863	500.808	456.302	416.674	387.164	361.127	336.304	319.112	298.321	287.031
1A00	6790.42	4676.97	2896.15	2003.46	1499.59	1179.43	961.361	816.041	708.356	623.712	555.466	502.673	460.52	424.878	394.789	369.518	344.087	324.255	305.153	292.127
1Y46	6900.58	4729.41	2928.99	1983.82	1486.2	1170.88	955.365	807.954	702.428	616.612	548.714	495.734	453.793	420.572	389.122	362.506	339.187	319.717	298.891	286.268
1A0U	6712.27	4622.61	2863.82	1974.55	1471.83	1163.38	954.494	804.139	700.998	615.405	553.848	495.769	450.483	415.858	384.771	365.337	339.69	318.342	300.758	289.182
1A0Z	6794.62	4660.98	2903.15	1985.56	1495.3	1177.82	961.988	817.349	713.499	626.591	559.328	502.601	459.916	422.891	391.167	362.563	340.814	321.665	304.323	288.39

## Sheet: AA_phi_ind
	AA_phi_ind_1.4A	AA_phi_ind_2A	AA_phi_ind_3A	AA_phi_ind_4A	AA_phi_ind_5A	AA_phi_ind_6A	AA_phi_ind_7A	AA_phi_ind_8A	AA_phi_ind_9A	AA_phi_ind_10A	AA_phi_ind_11A	AA_phi_ind_12A	AA_phi_ind_13A	AA_phi_ind_14A	AA_phi_ind_15A	AA_phi_ind_16A	AA_phi_ind_17A	AA_phi_ind_18A	AA_phi_ind_19A	AA_phi_ind_20A
	1.4	2	3	4	5	6	7	8	9	10	11	12	13	14	15	16	17	18	19	20
1Y4G	0.0226348	0.0229265	0.0224183	0.0218171	0.0217954	0.0215637	0.0218825	0.0218875	0.0221375	0.0218014	0.0235769	0.0235047	0.0233306	0.0230511	0.0232885	0.023226	0.0225935	0.0226978	0.0224892	0.0224343
1Y4F	0.0225477	0.0228075	0.0223382	0.0217577	0.0218001	0.0215224	0.0218704	0.0218031	0.0221121	0.0215999	0.0232668	0.0234916	0.0233575	0.0231845	0.0233099	0.0233033	0.0226527	0.0228742	0.0227983	0.0225585
1A01	0.0223737	0.0227039	0.0222721	0.0216636	0.0215208	0.0215274	0.0217002	0.0218119	0.0220199	0.0216347	0.0234018	0.0235496	0.0232482	0.0230832	0.0231706	0.0232575	0.0226999	0.0227624	0.0228534	0.0227442
1Y4P	0.0227091	0.023029	0.0225716	0.0219594	0.0218198	0.0216935	0.0219469	0.0221246	0.0223273	0.0217856	0.0233843	0.0235907	0.0234435	0.0232515	0.0232976	0.0233684	0.0224594	0.0226181	0.0226658	0.0224173
1A00	0.0225163	0.0227871	0.0223255	0.0217792	0.021772	0.0216606	0.021711	0.0217458	0.0219711	0.021482	0.0233292	0.0235287	0.0231527	0.0229399	0.0231709	0.0233565	0.022545	0.0228511	0.0225789	0.0224069
1Y46	0.0226677	0.0229675	0.0224592	0.0220171	0.0218717	0.0218623	0.0220766	0.0221709	0.0223653	0.0218649	0.0235207	0.0235013	0.0232151	0.0231665	0.0232133	0.0232788	0.0226732	0.0225688	0.0224385	0.022373
1A0U	0.0224975	0.0228025	0.0223079	0.021822	0.0216753	0.0217373	0.0218441	0.0218432	0.0221176	0.0216481	0.0235519	0.0235612	0.0233727	0.0229622	0.0230383	0.0230853	0.0227071	0.0227776	0.0226205	0.0225496
1A0Z	0.0225229	0.0228235	0.022382	0.021815	0.0217093	0.0216726	0.0217761	0.0216417	0.0220349	0.0216273	0.0234612	0.0235651	0.0233485	0.0231463	0.0232328	0.0232883	0.0227077	0.0227763	0.0225278	0.0223899

[truncated: 43 more sheets: AA_phi_pat, AA_T_phi_den, AA_S_phi_den, AA_T_amphi_ty, AA_amphi_den, AA_R_phophi_ty,  AA_R_phoamp_ty , AA_R_phophi_A, Chg_T_pos, Chg_pos_A, Chg_T_pos_den , Chg_S_pos_den, Chg_T_neg, Chg_neg_A, Chg_T_neg_den , Chg_S_neg_den, Chg_T, Chg_T_den ,  Chg_R_posneg , Chg_R_pos_tchg  …]
